# Supplementary figures and images for: The Role of Autophagy in Tumor Immune Infiltration in Colorectal Cancer
Source: Hindawi journal article supplement (doi:10.1155/2022/2055676), 2022-03-14

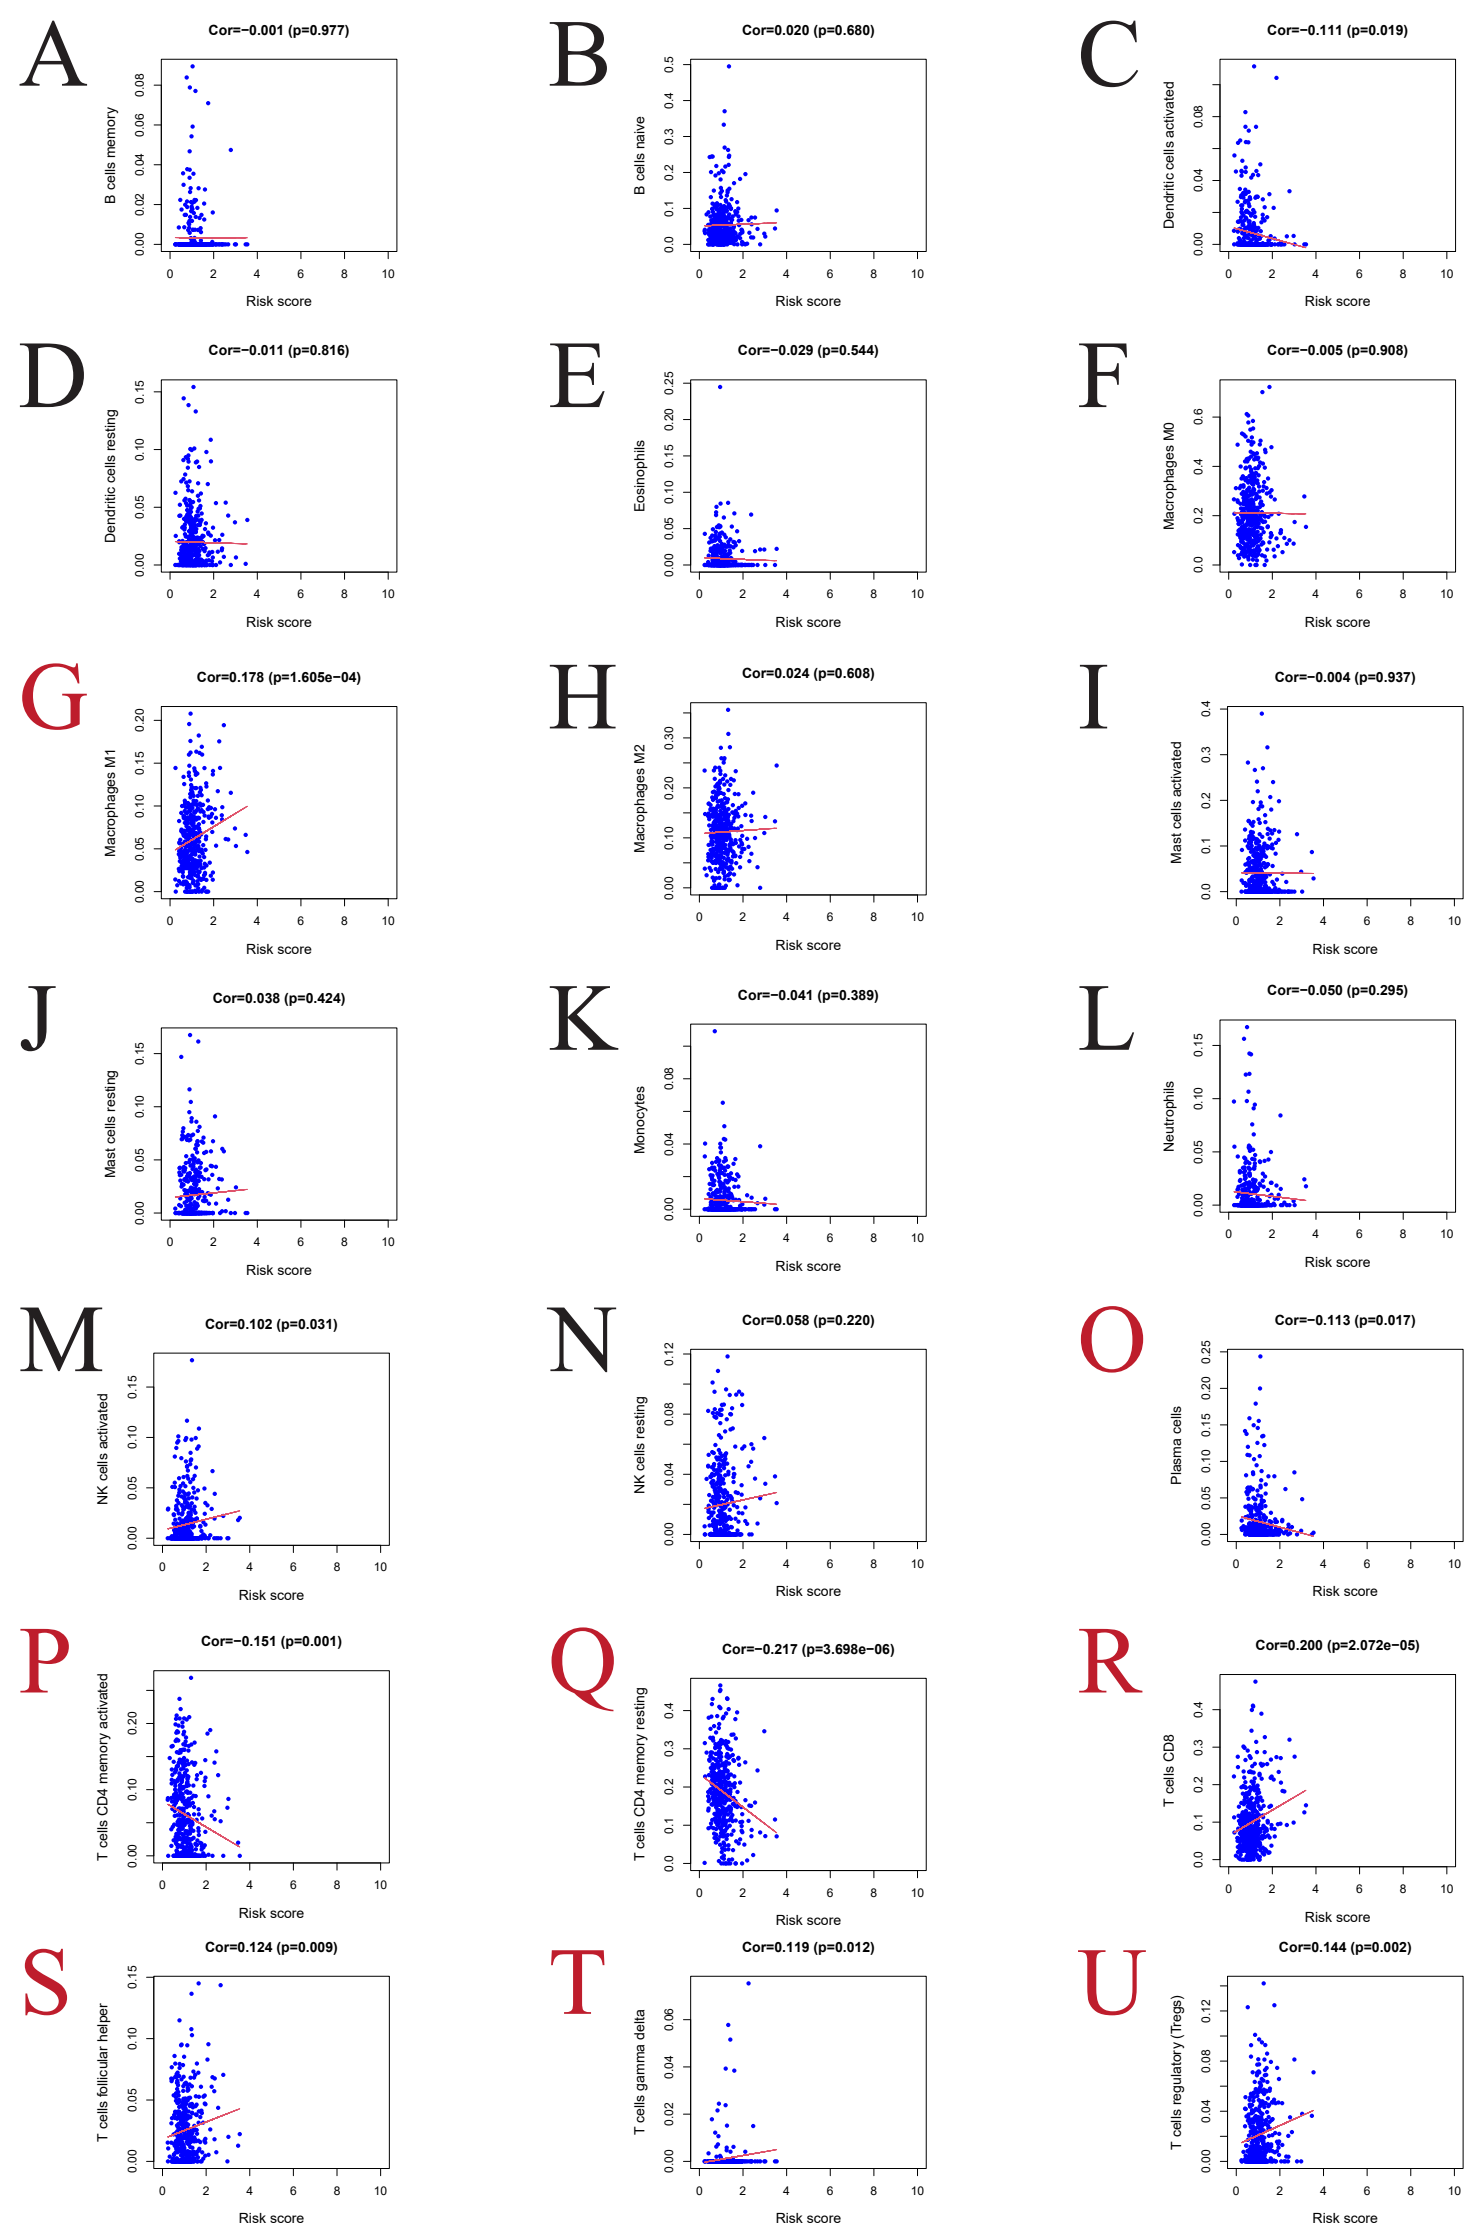

Supplement: f1 [file 2055676.f1.zip]

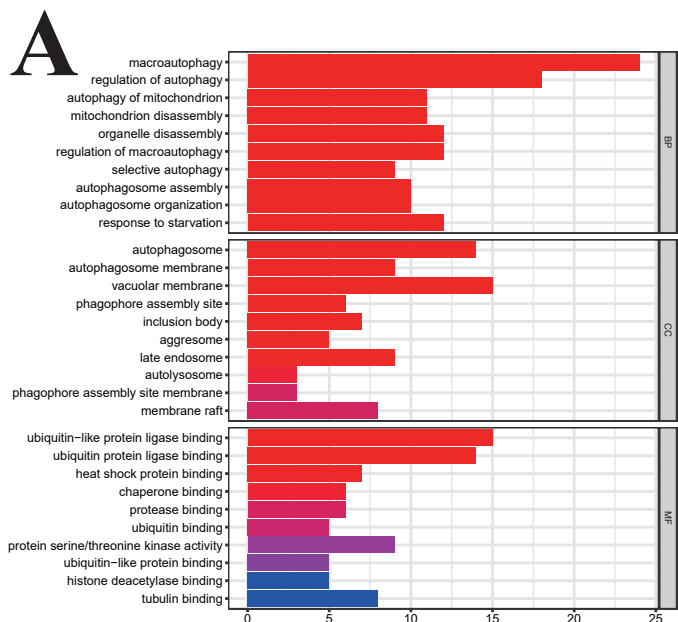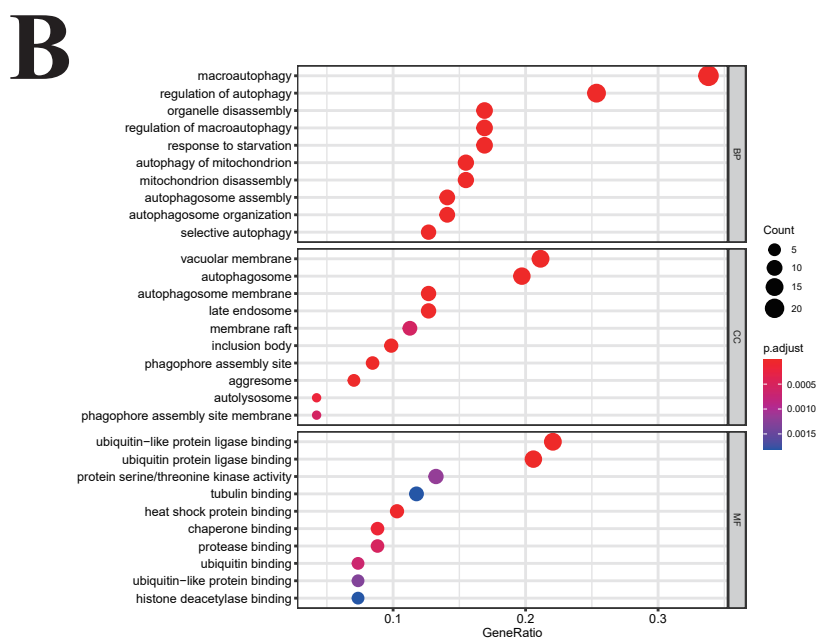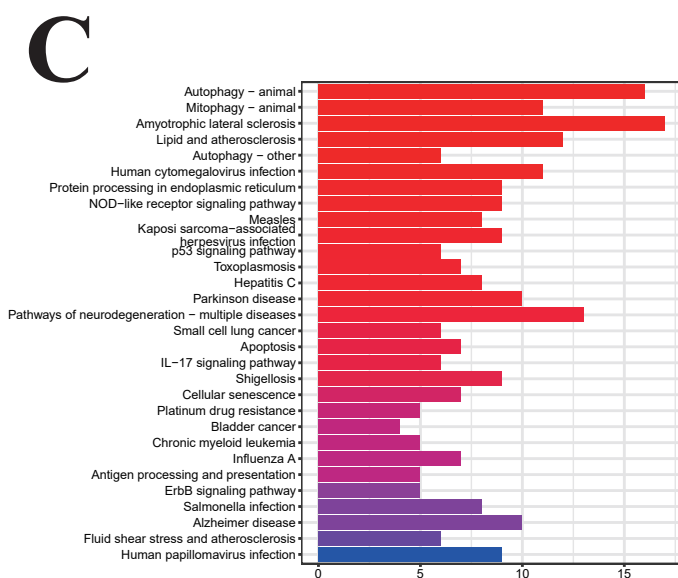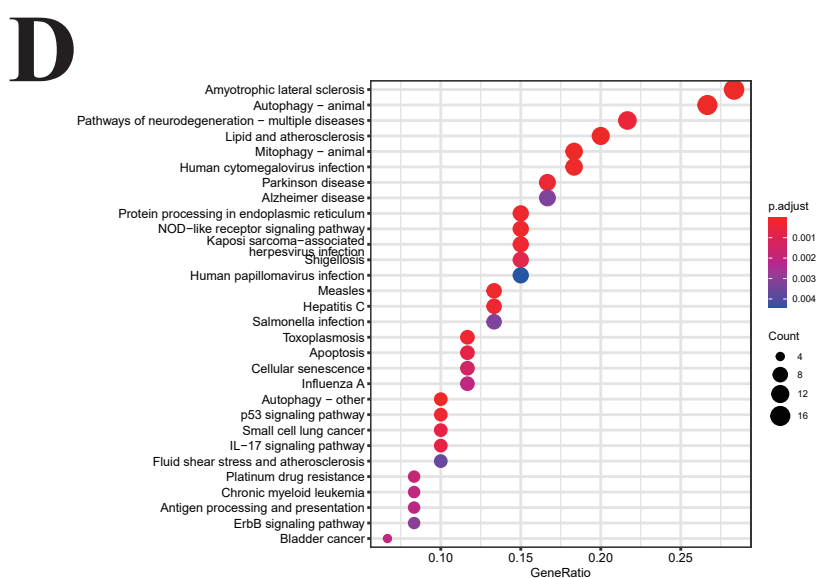

Supplement: f1 [file 2055676.f1.zip]

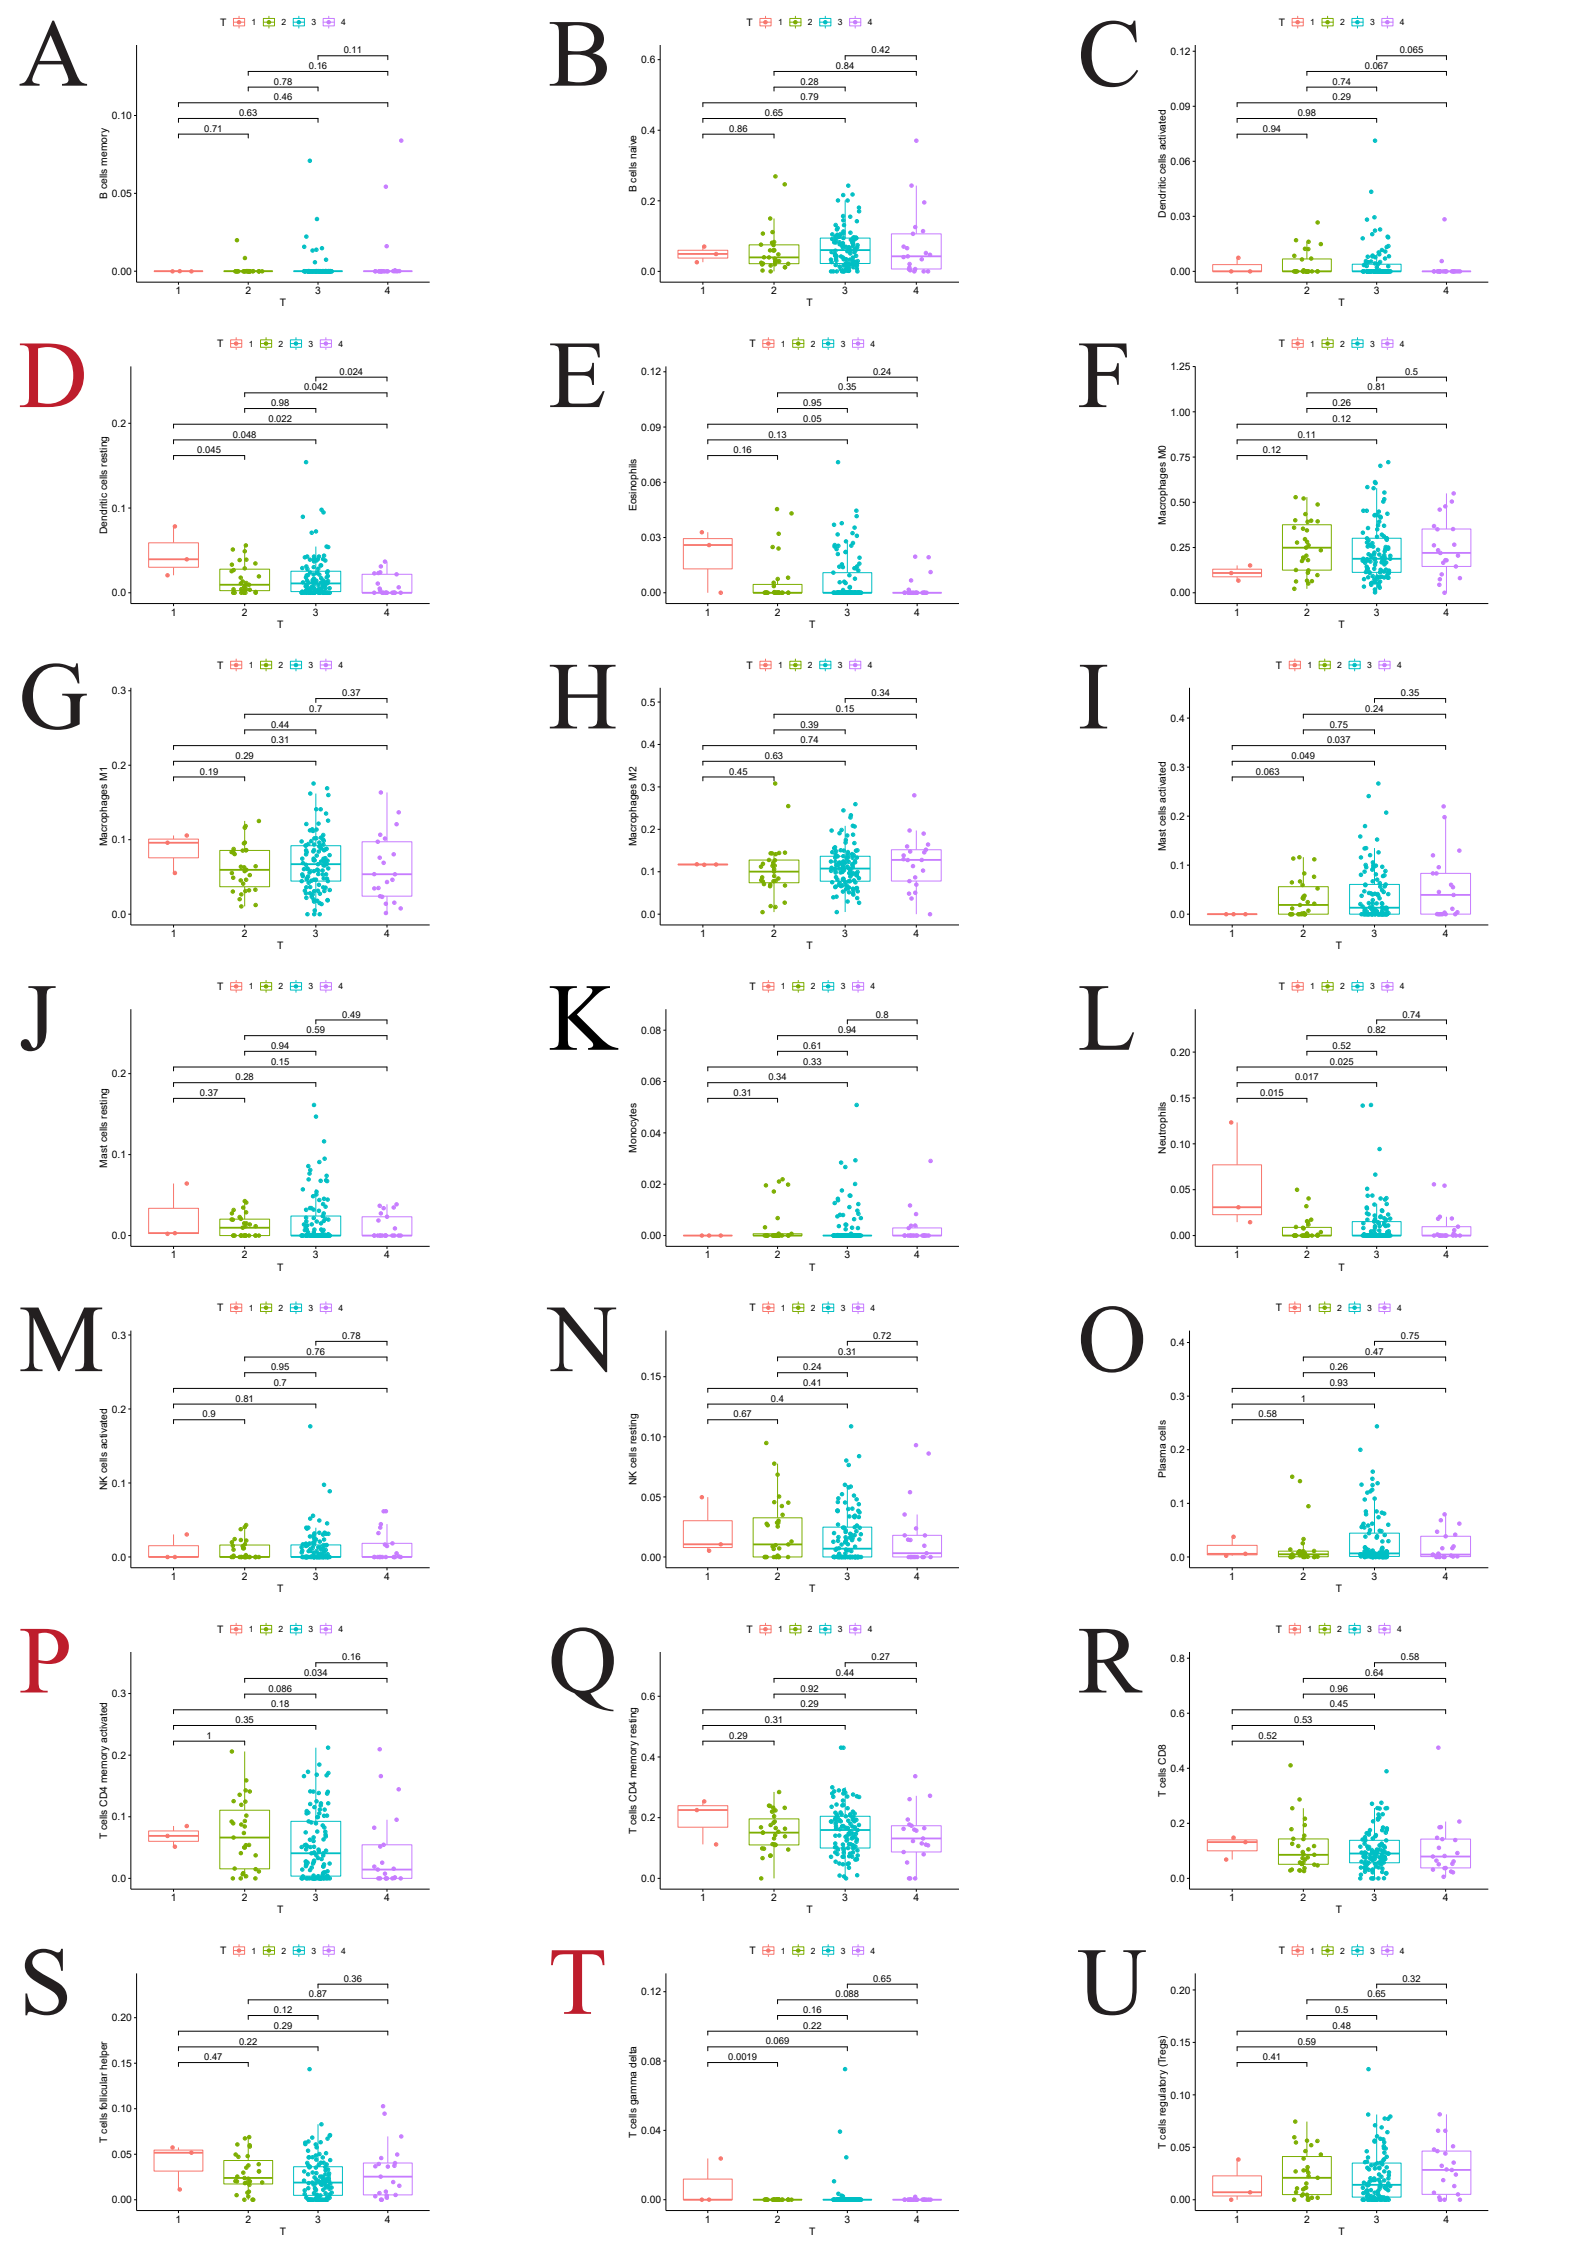

Supplement: f1 [file 2055676.f1.zip]

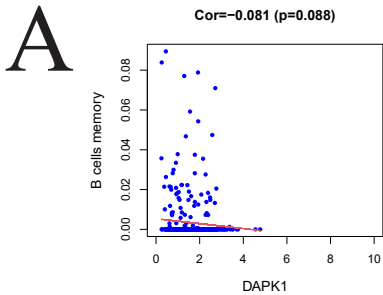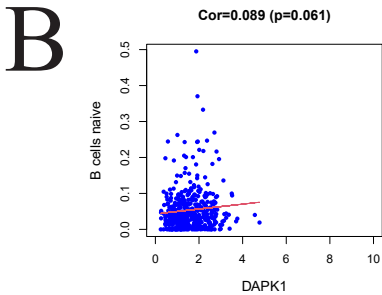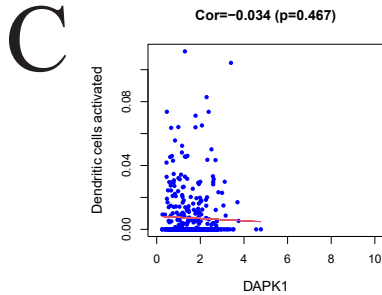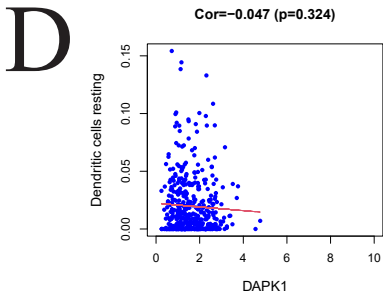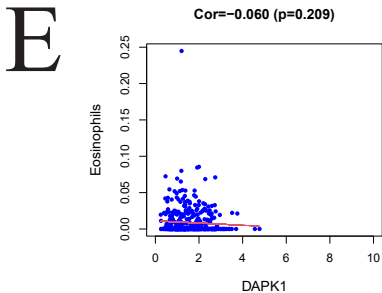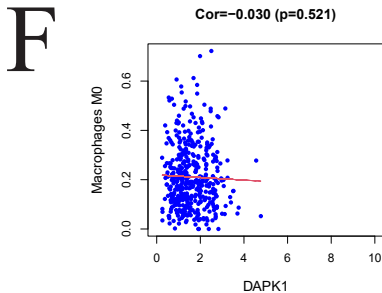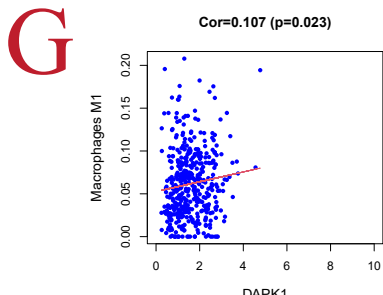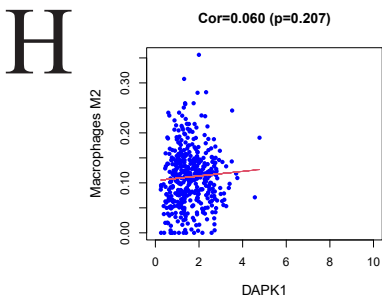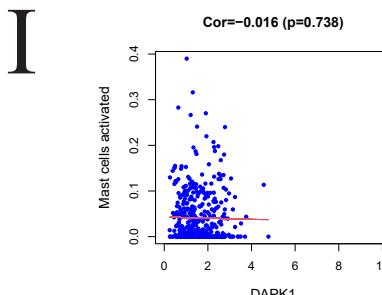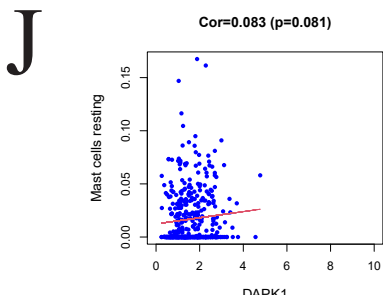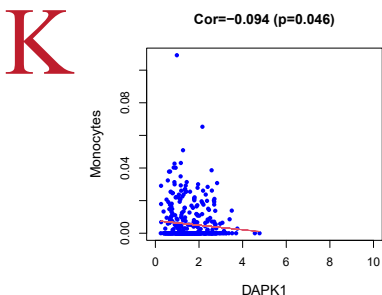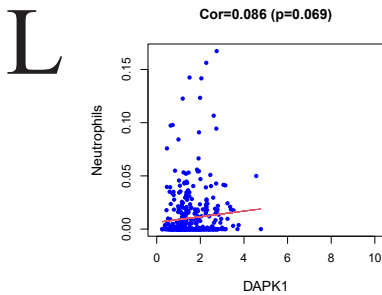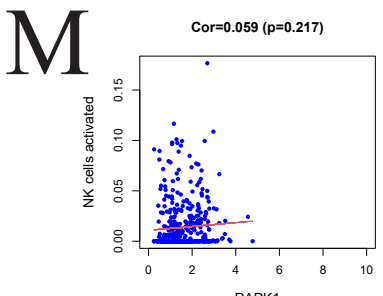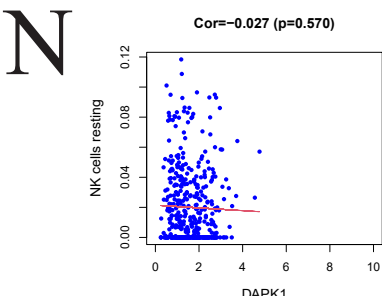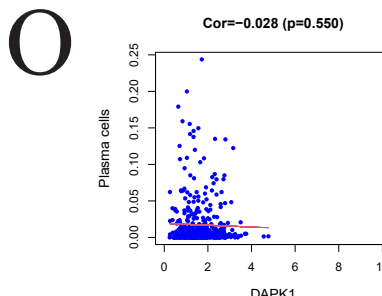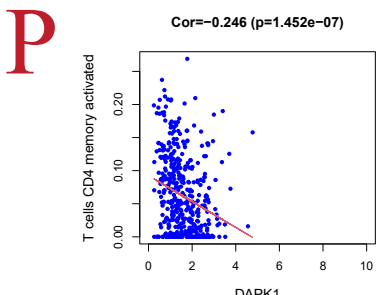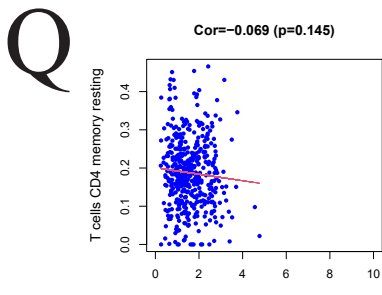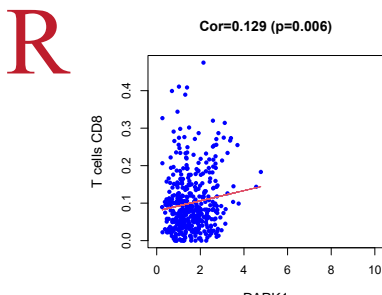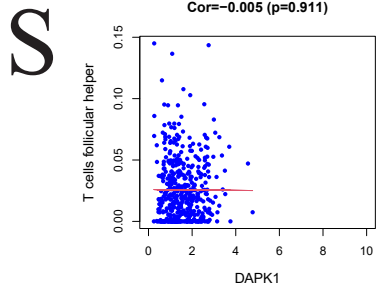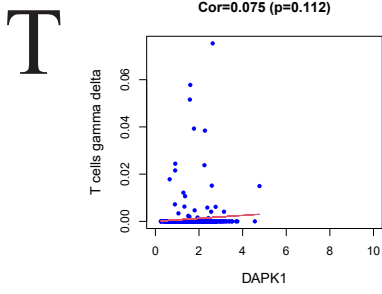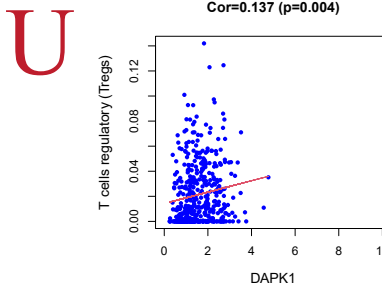

Supplement: f1 [file 2055676.f1.zip]

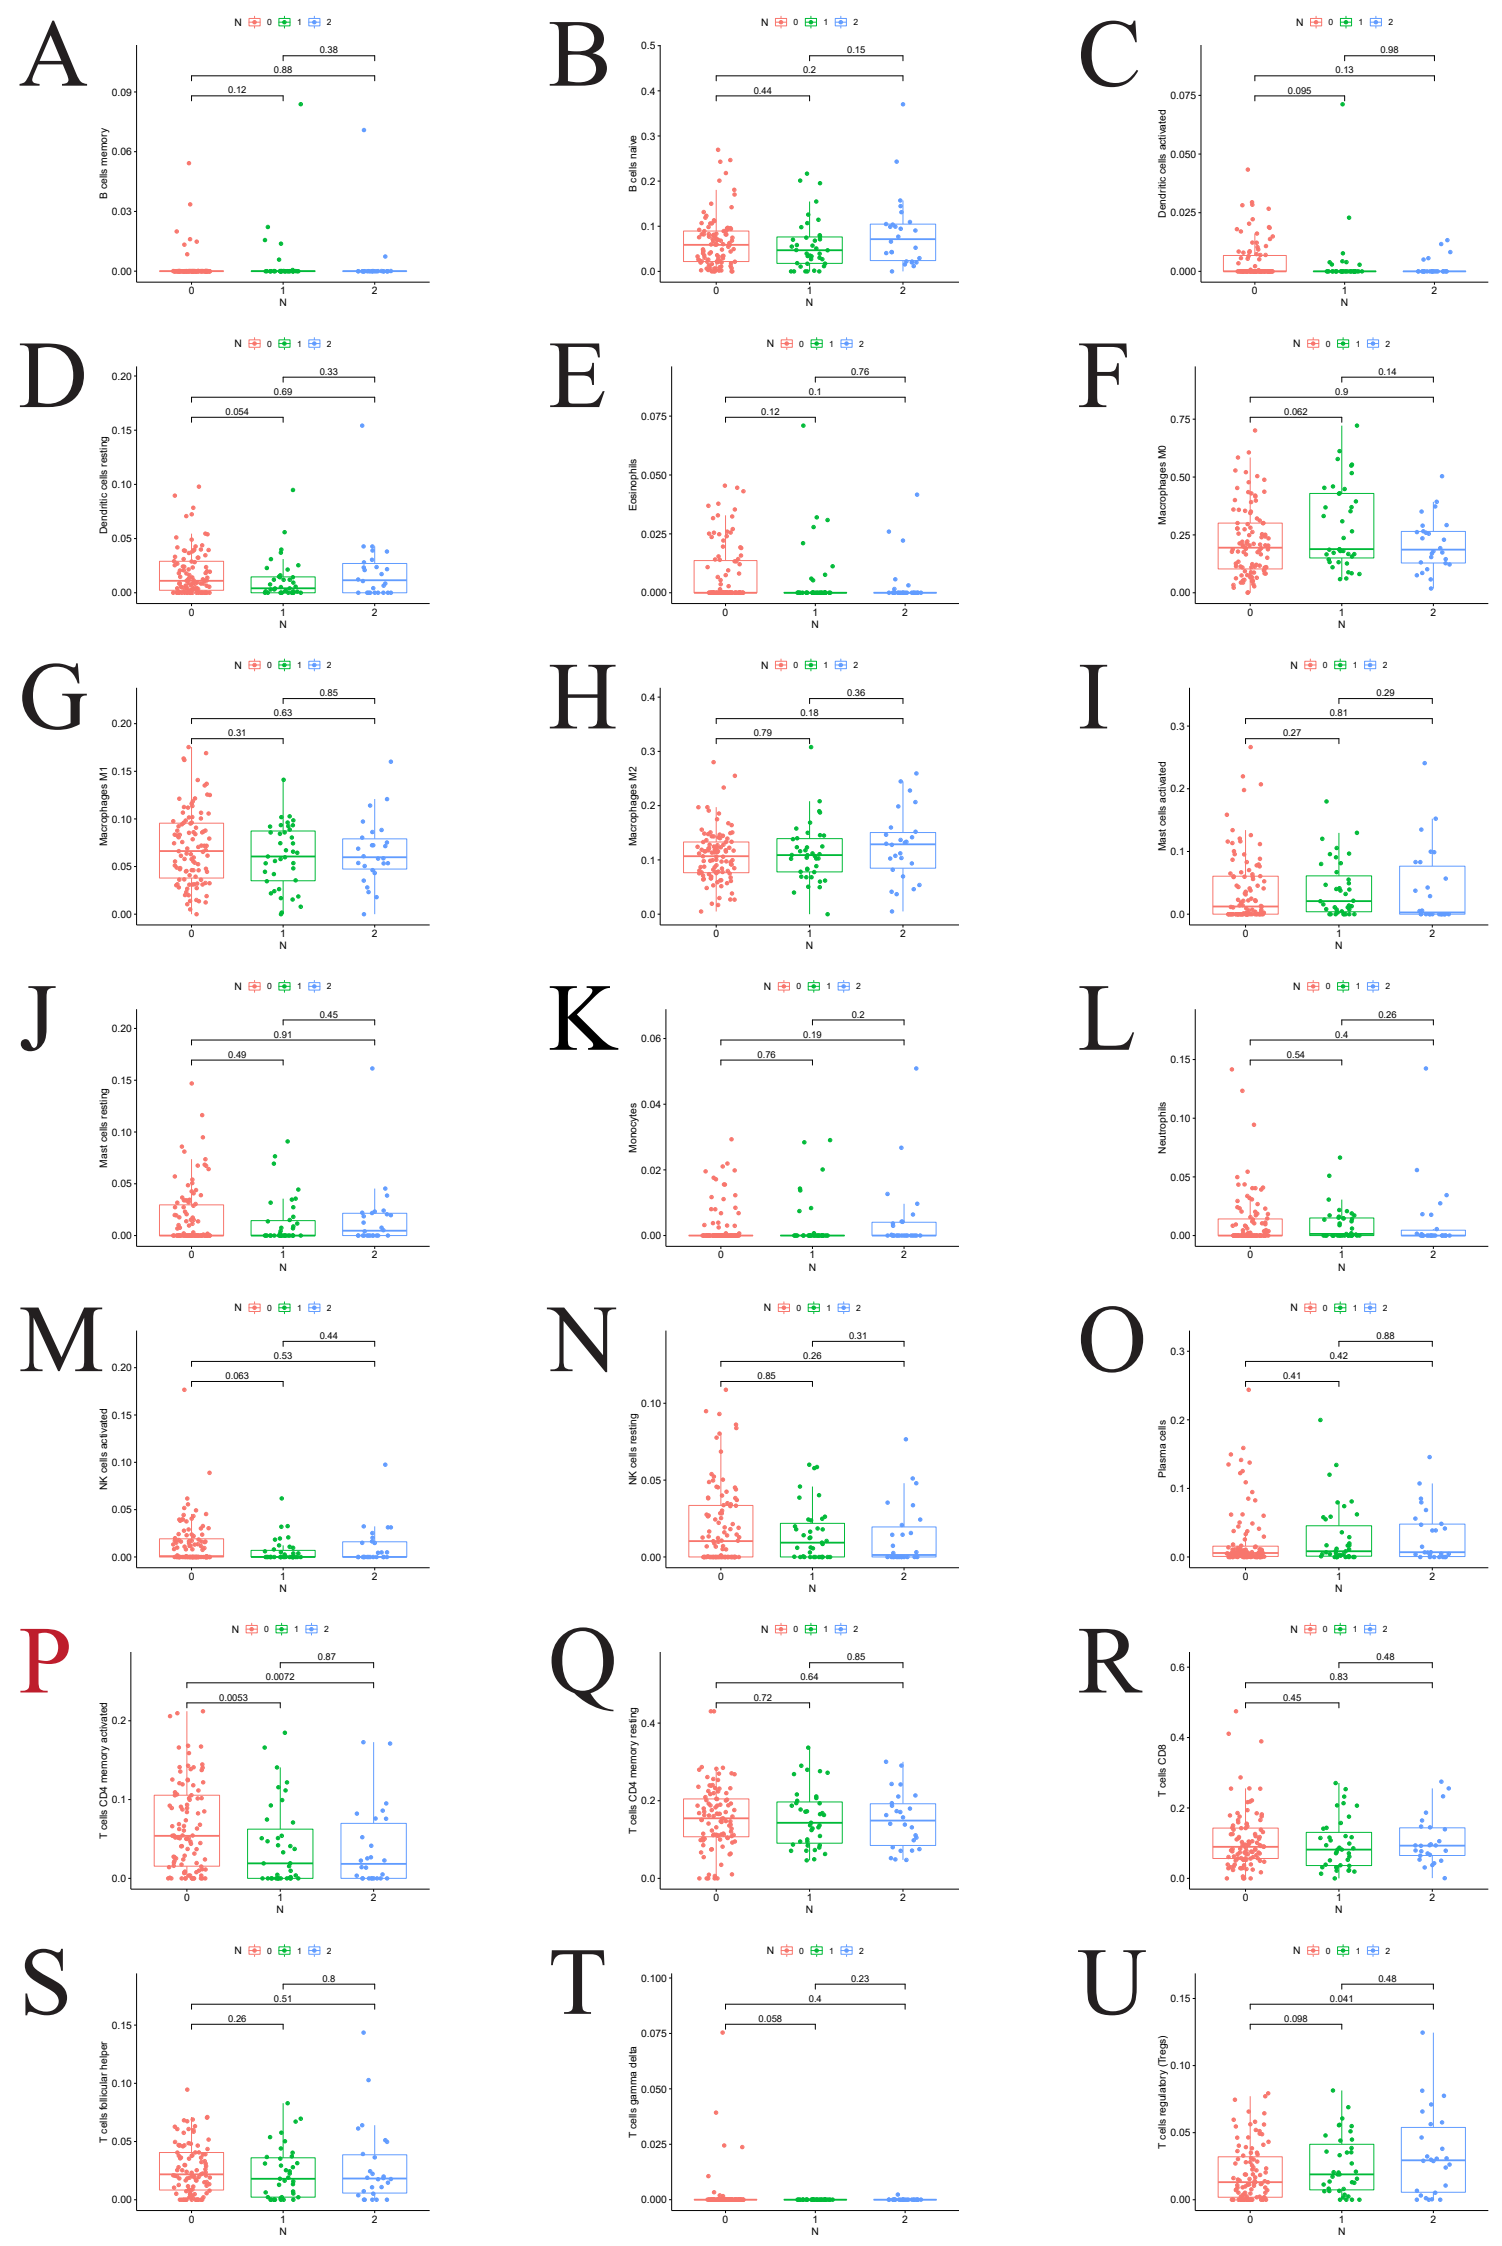

Supplement: f1 [file 2055676.f1.zip]

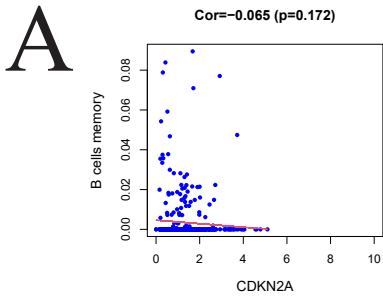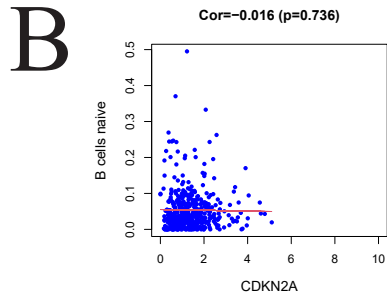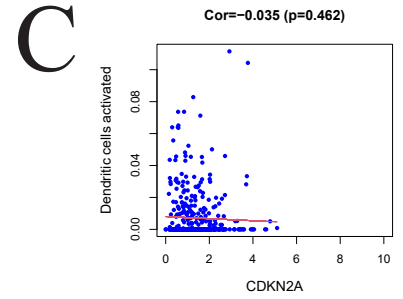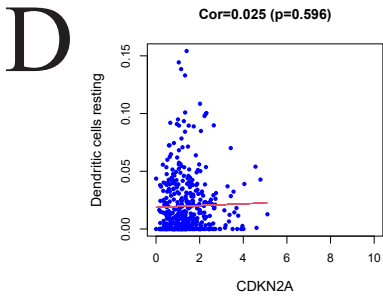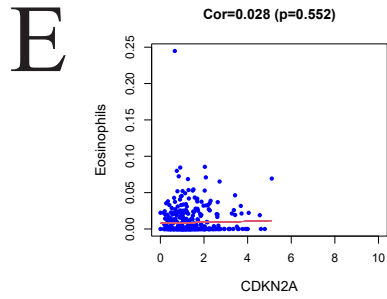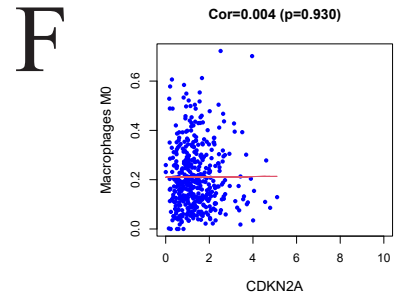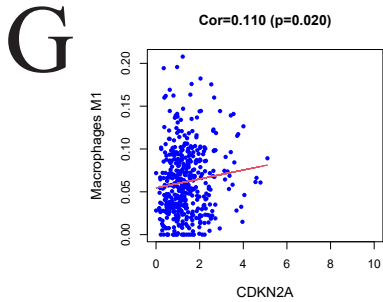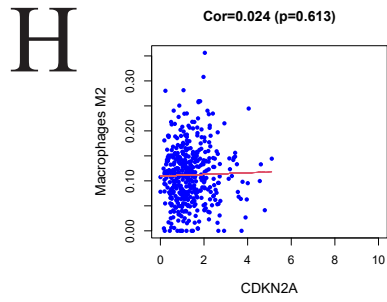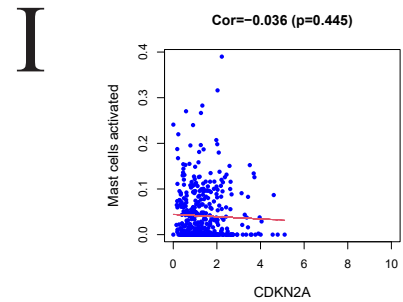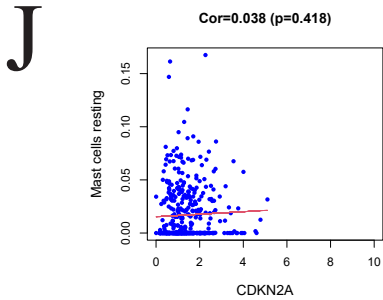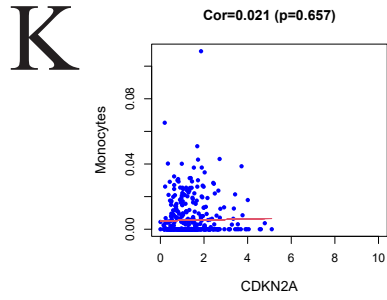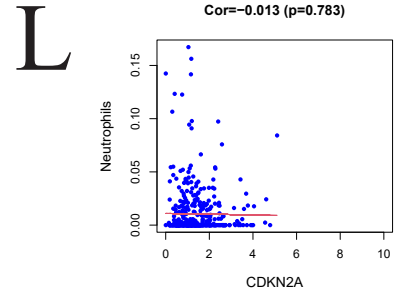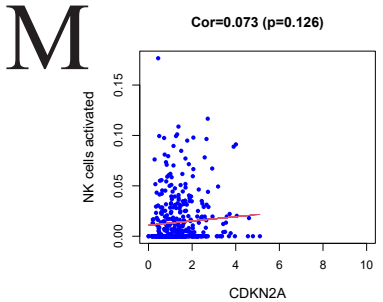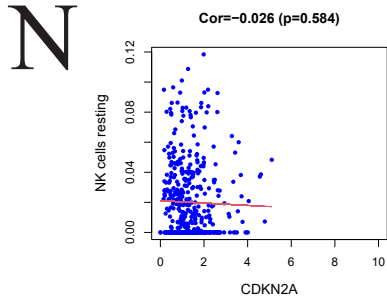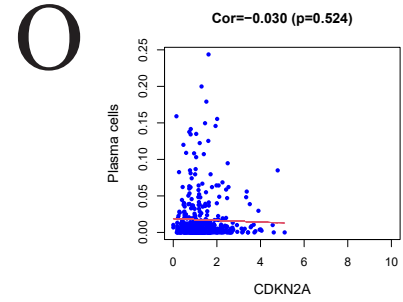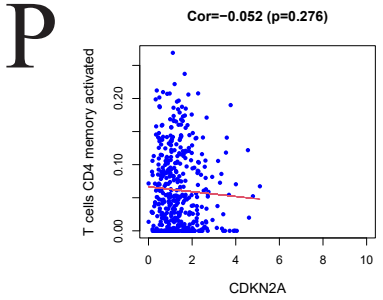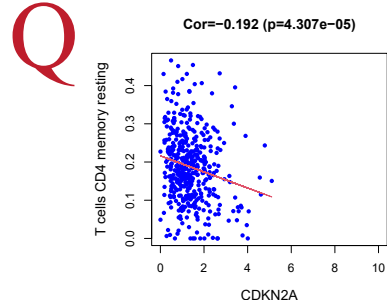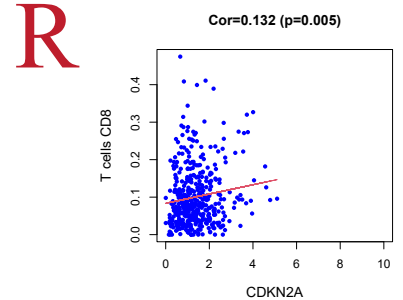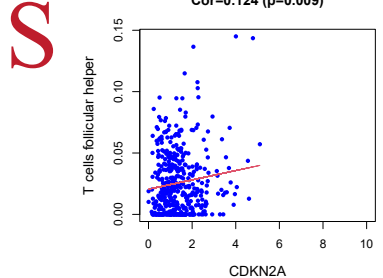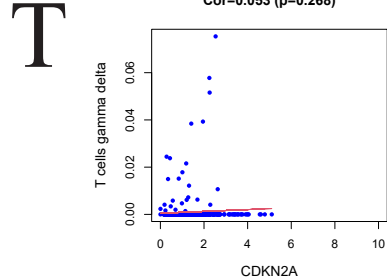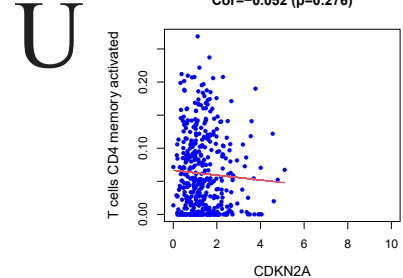

Supplement: f1 [file 2055676.f1.zip]

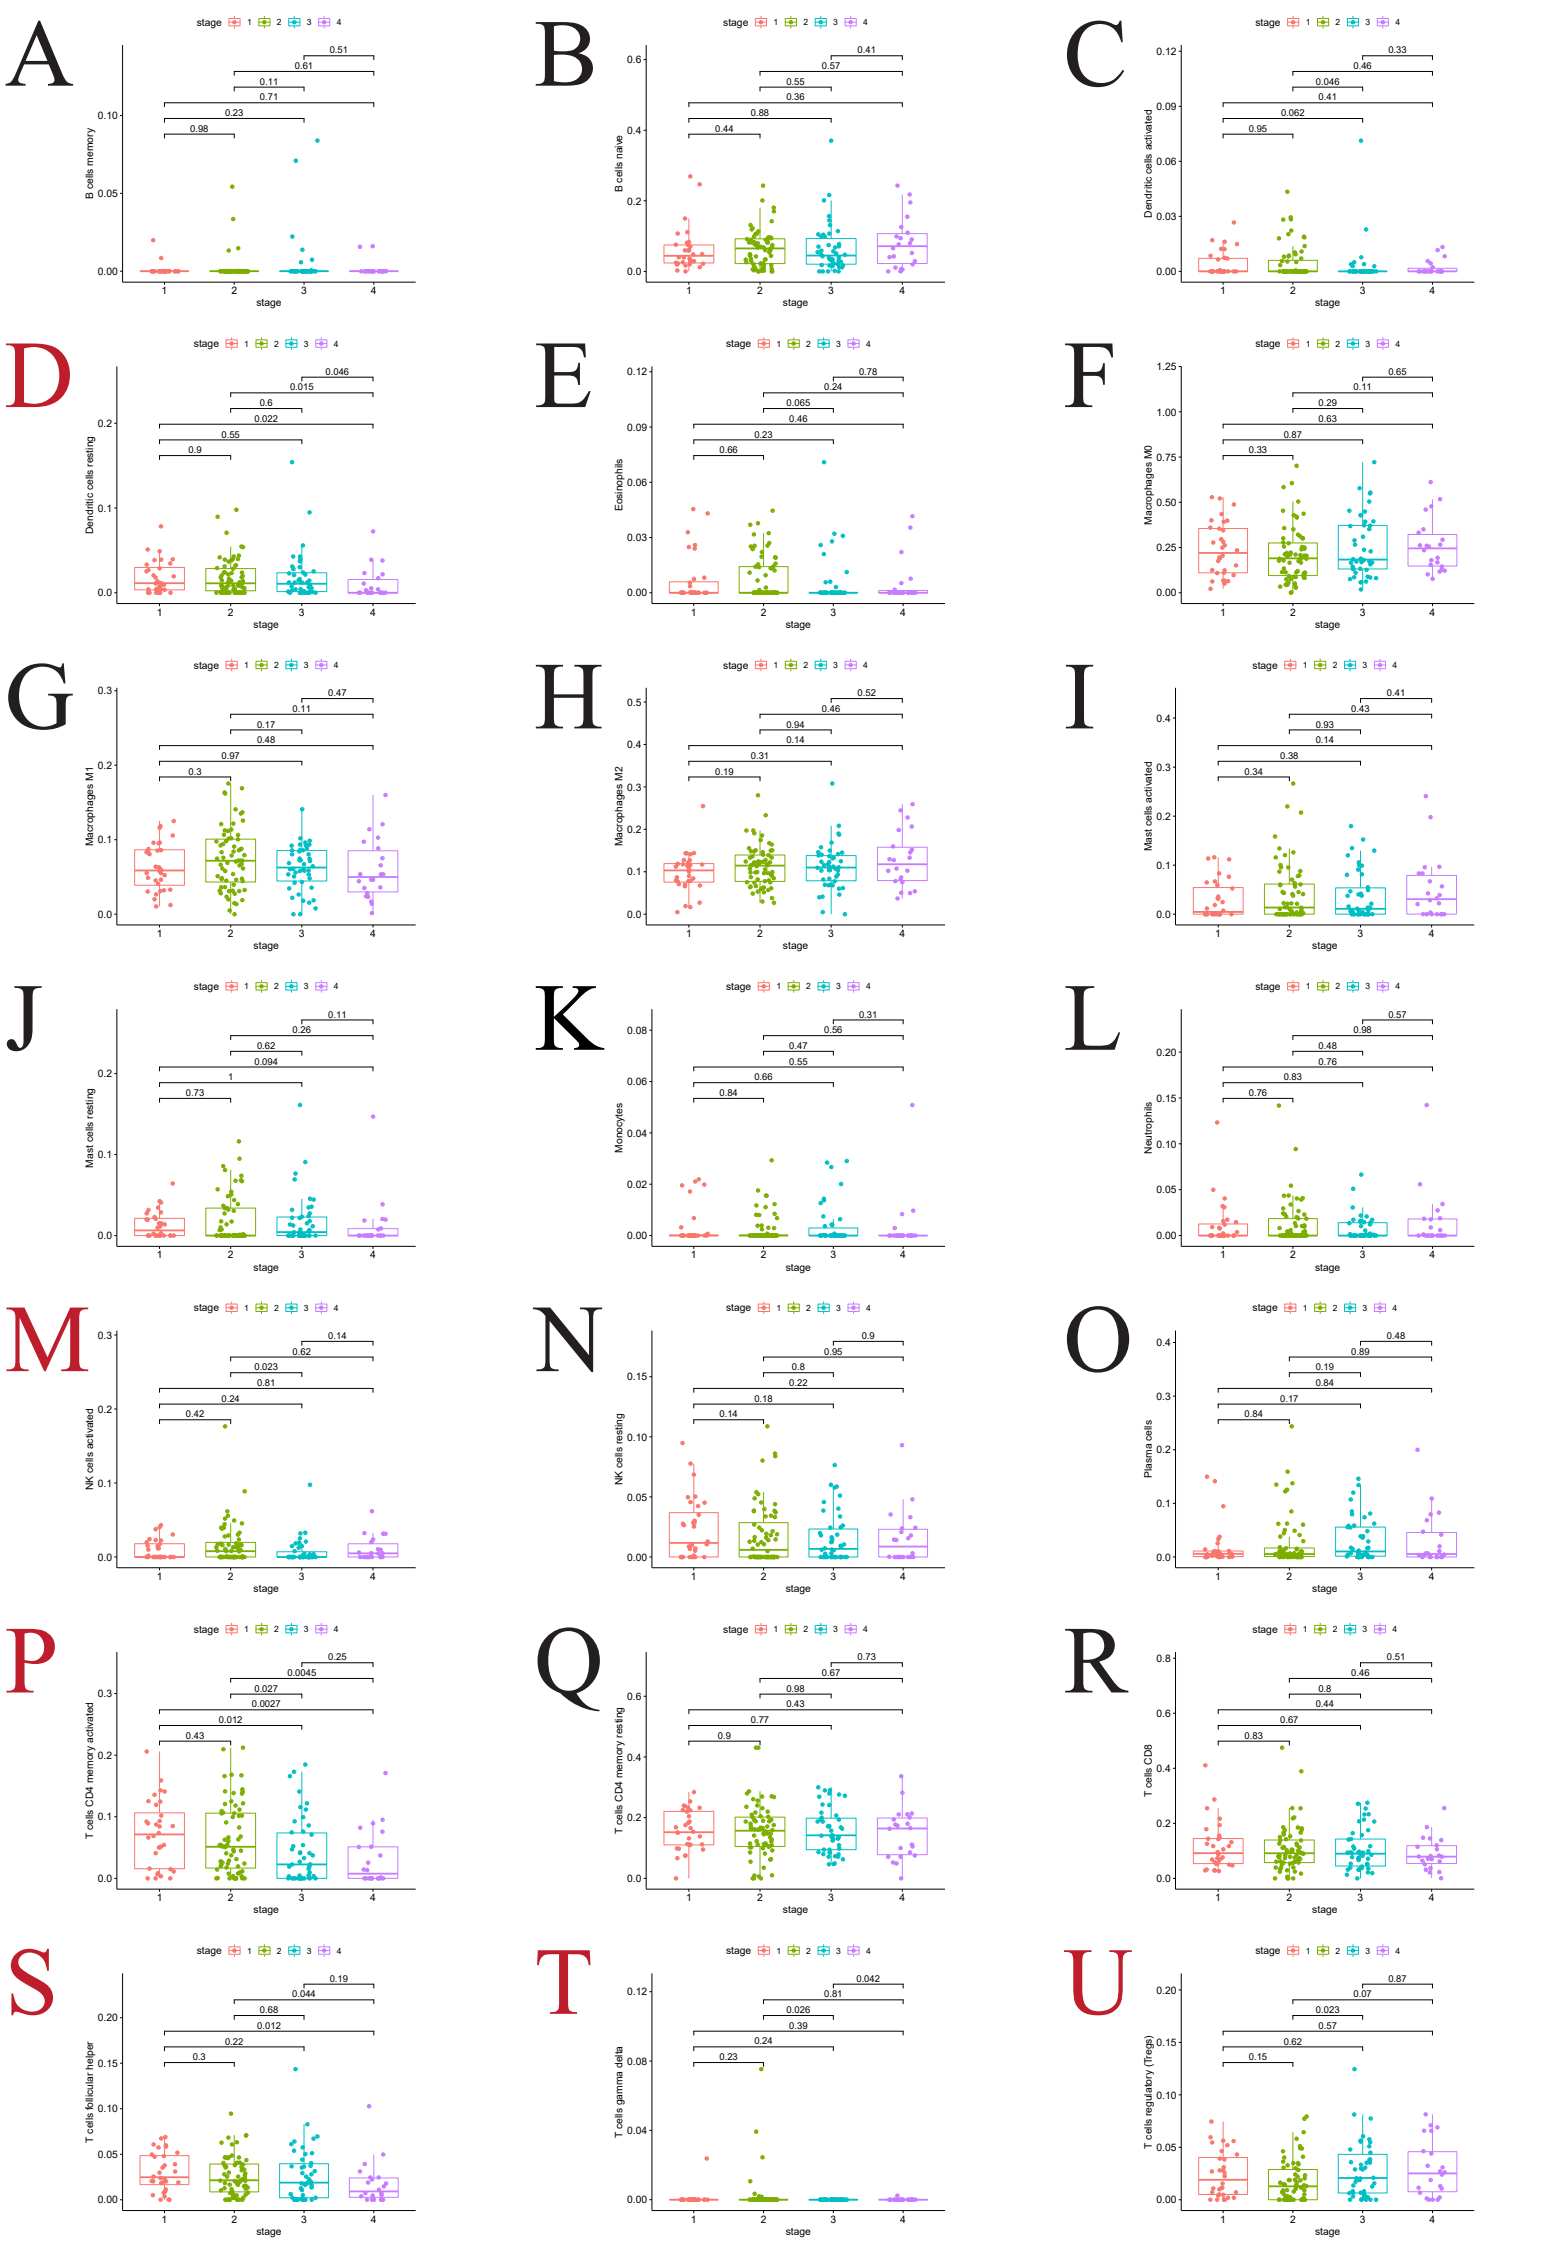

Supplement: f1 [file 2055676.f1.zip]

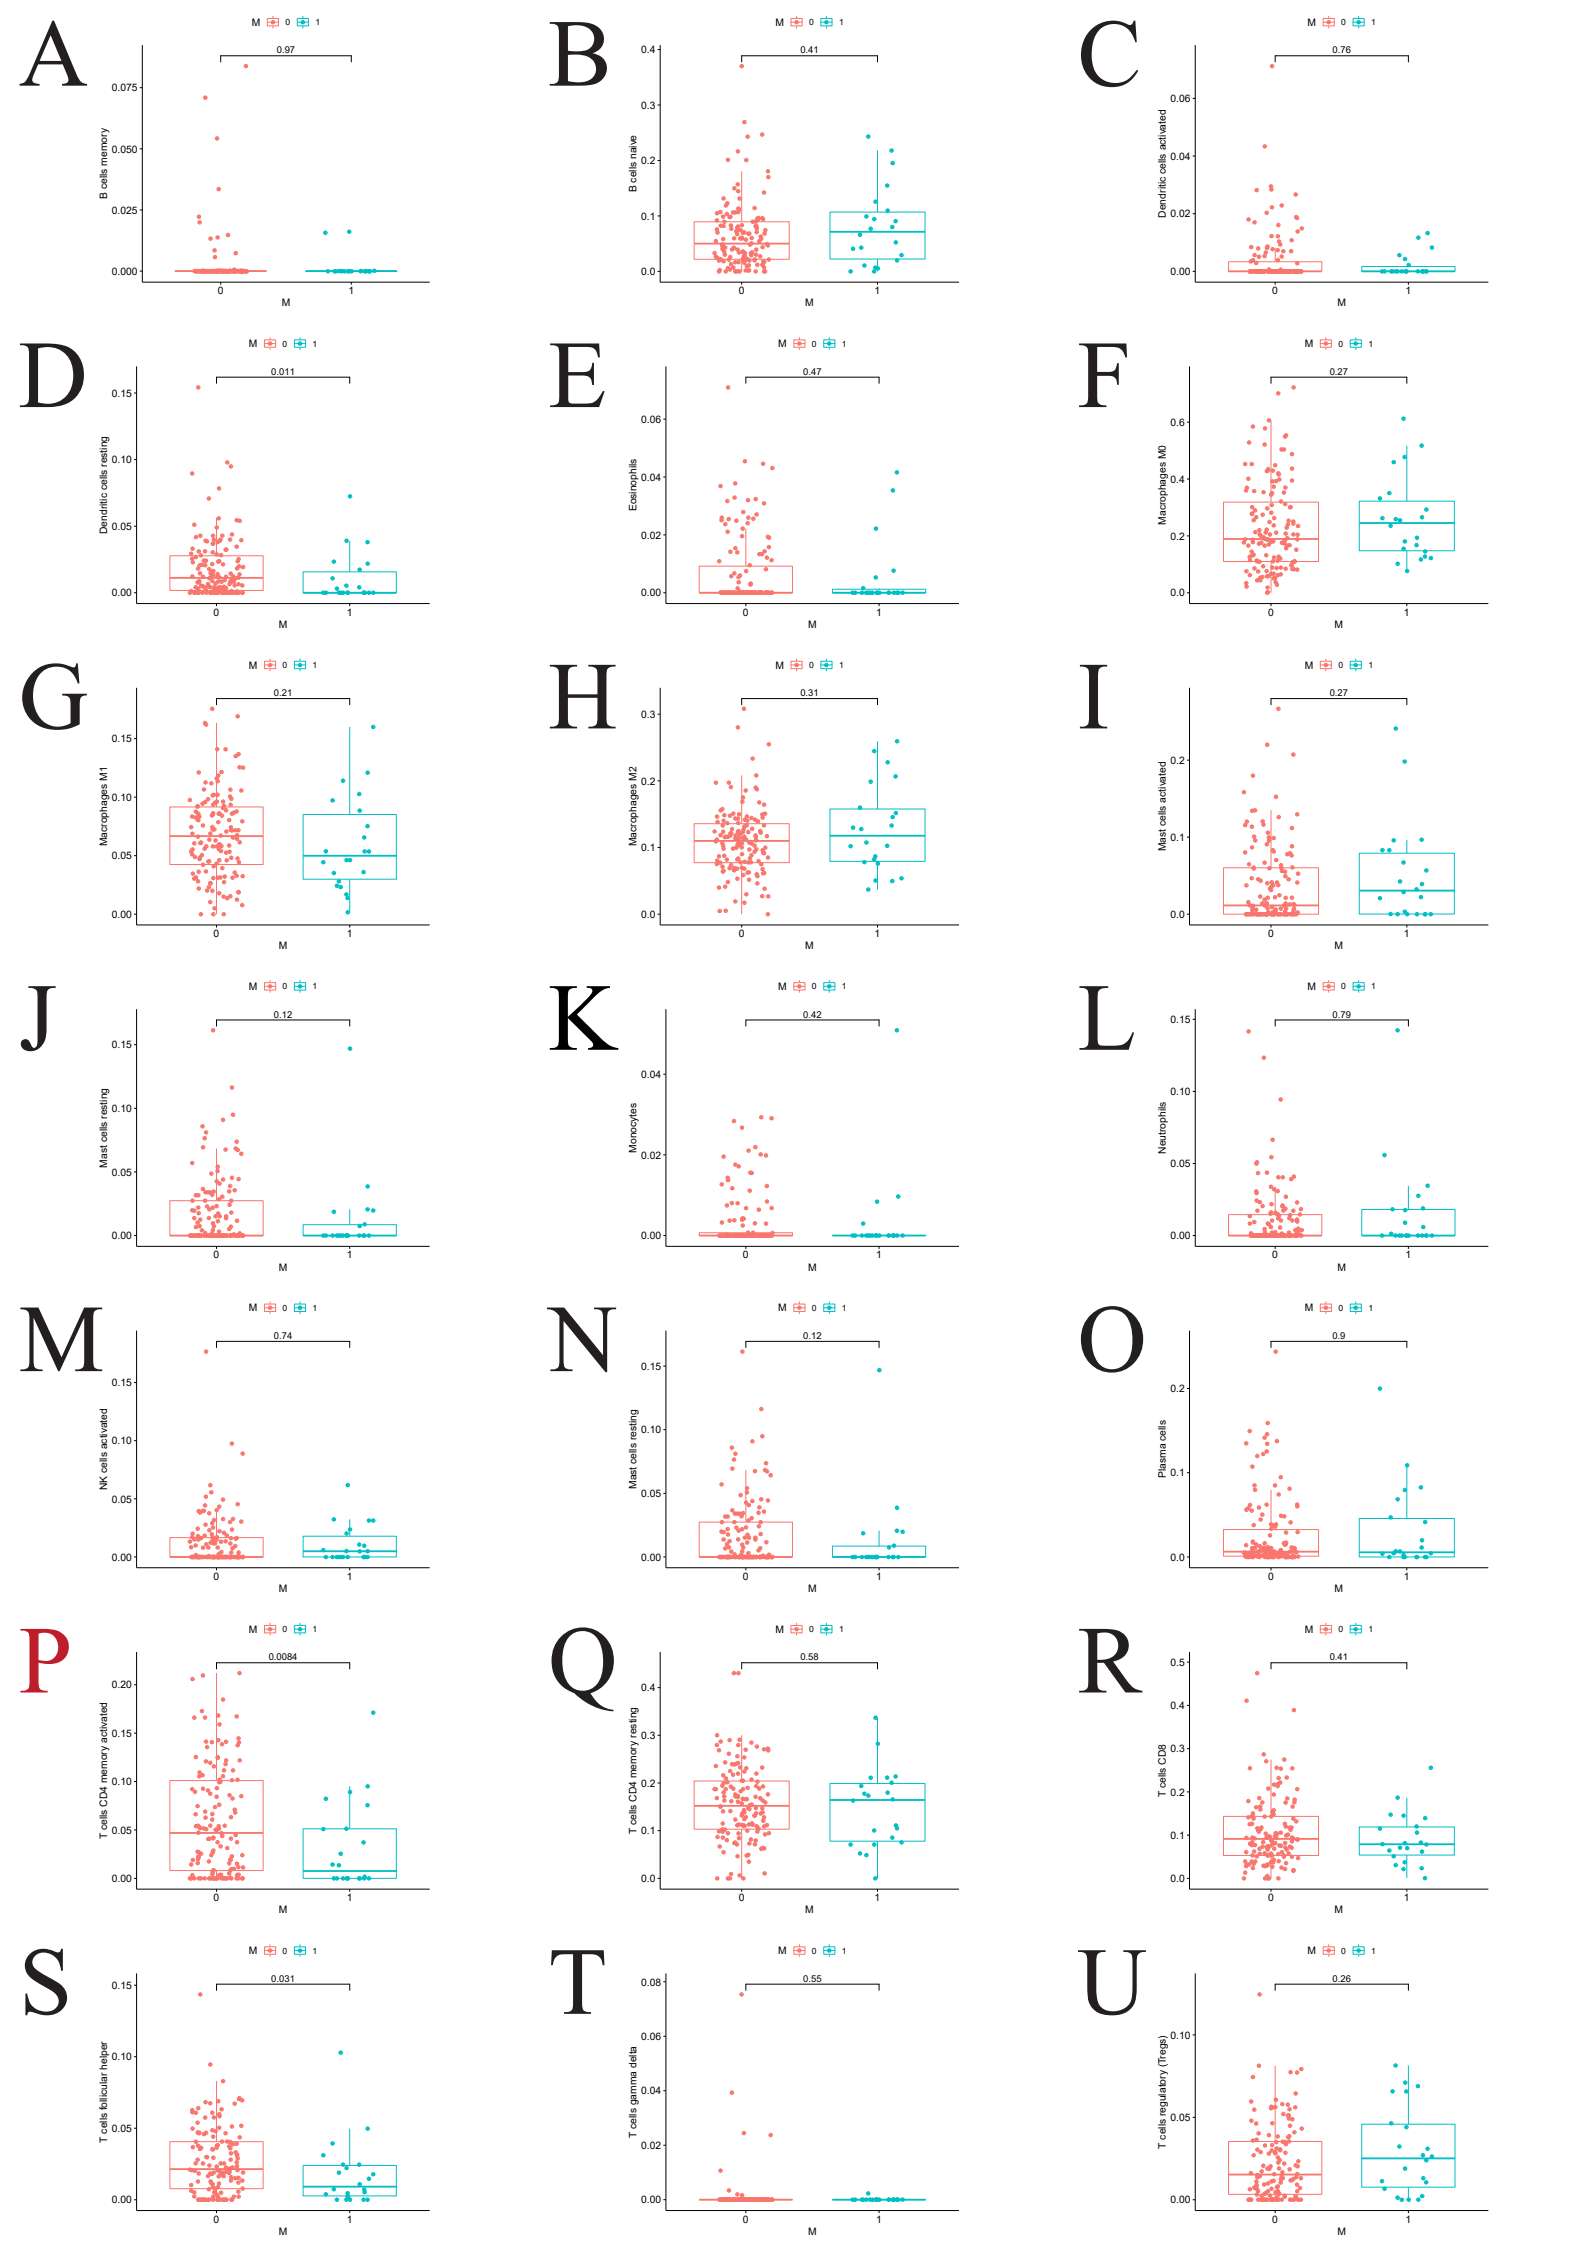

Supplement: f1 [file 2055676.f1.zip]

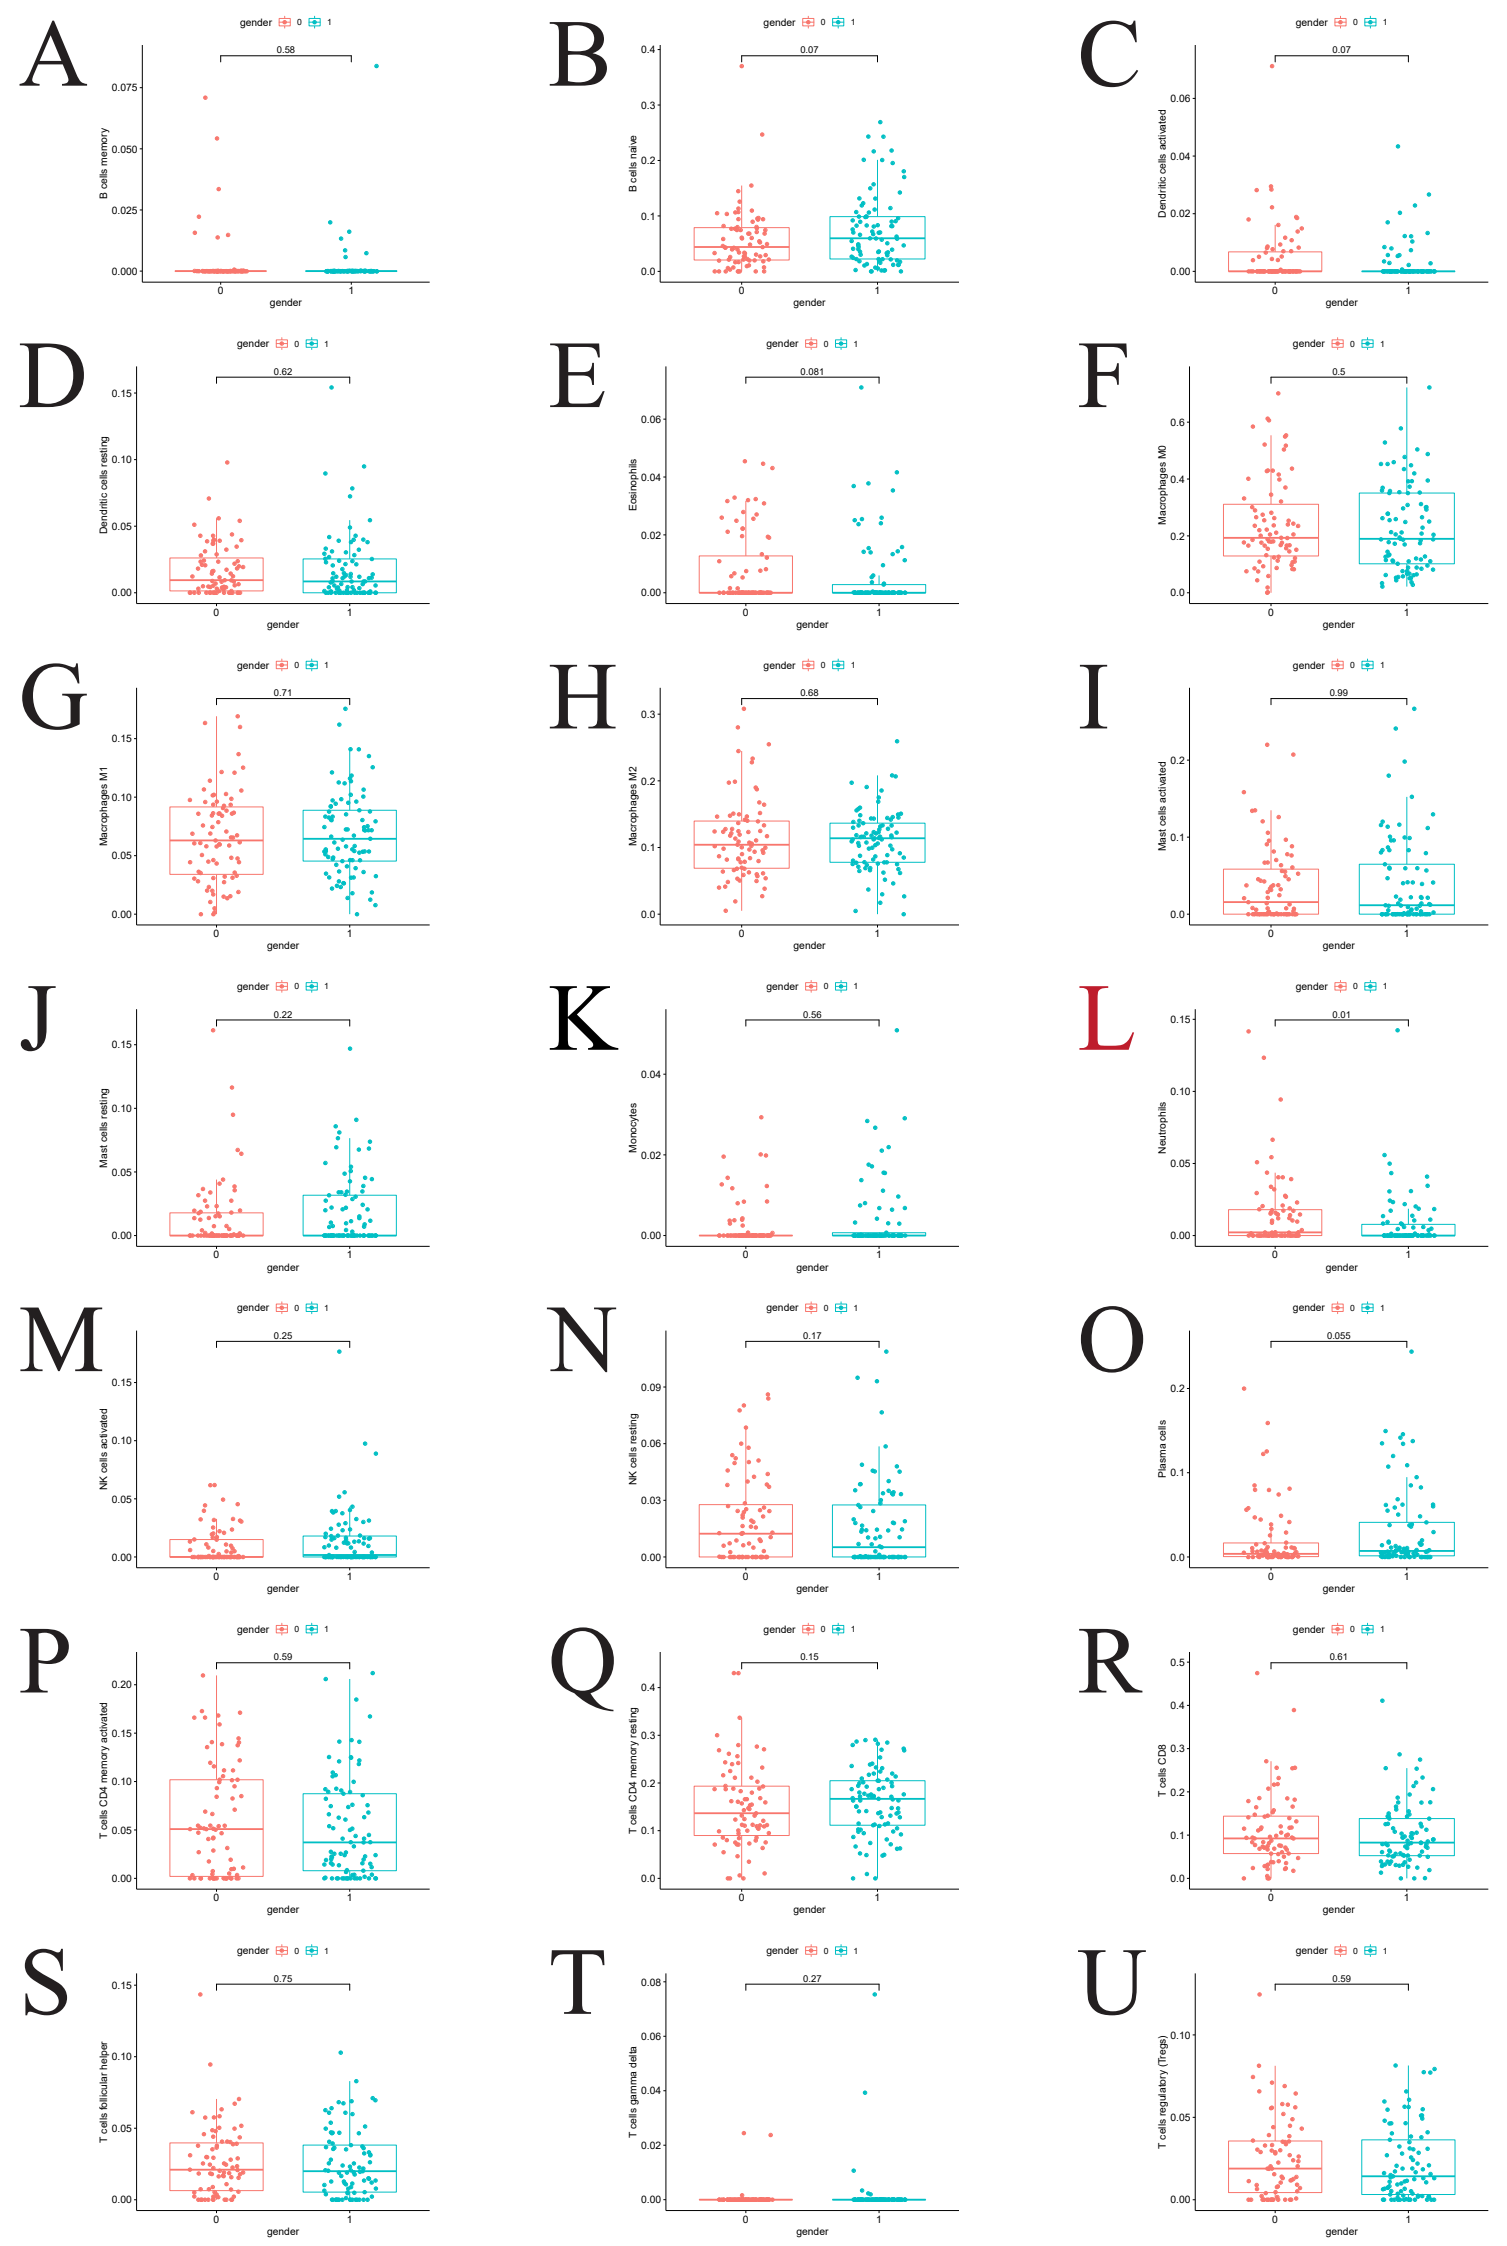

Supplement: f1 [file 2055676.f1.zip]

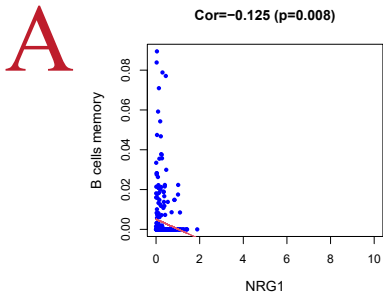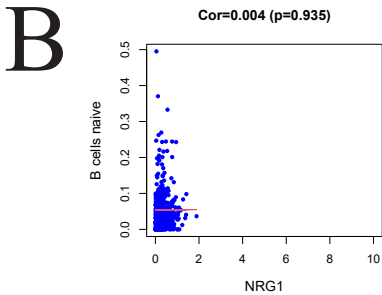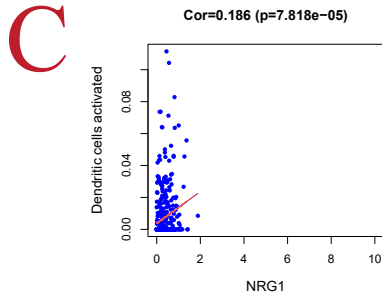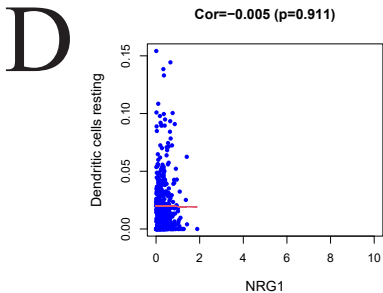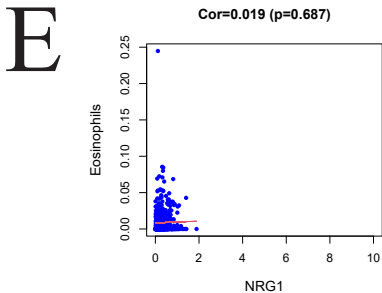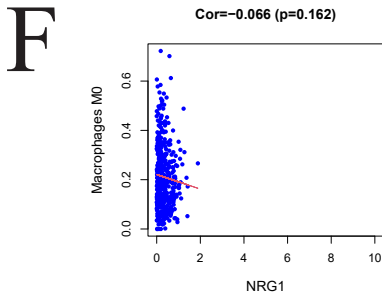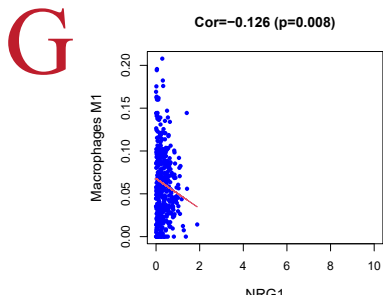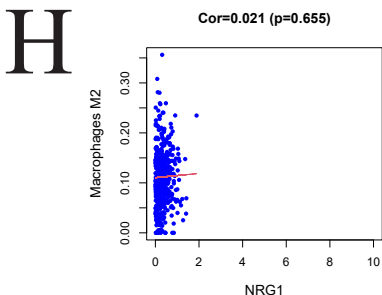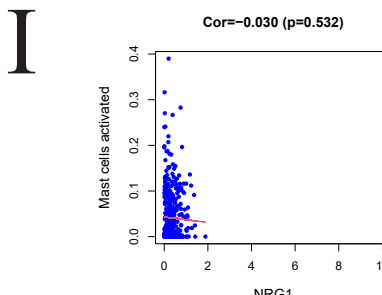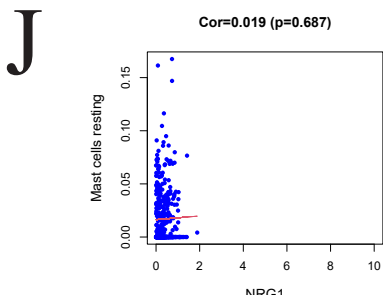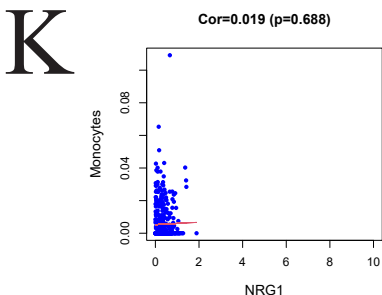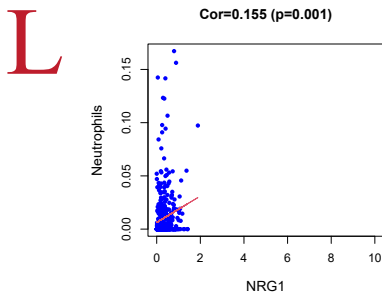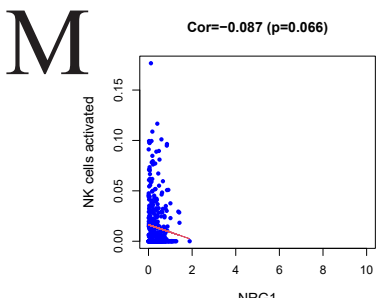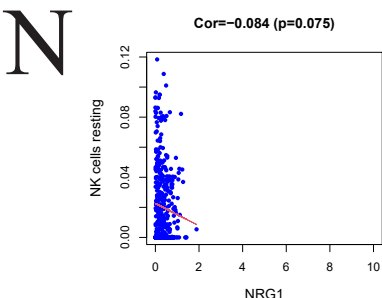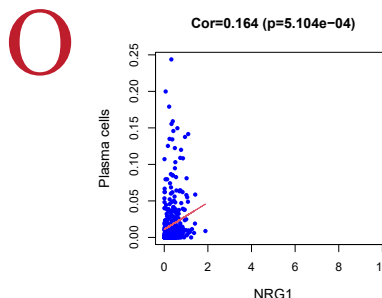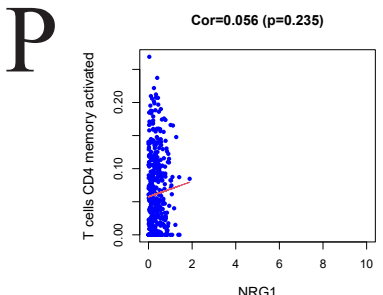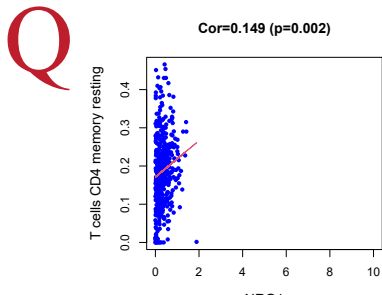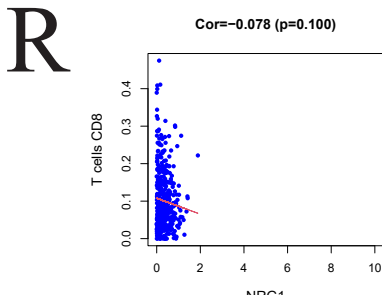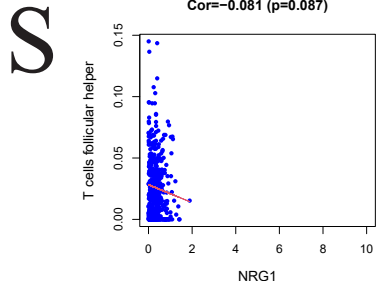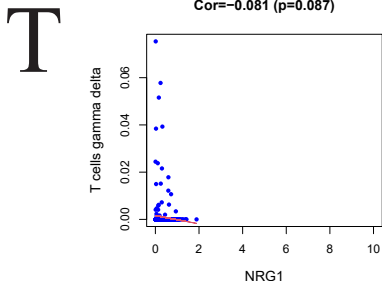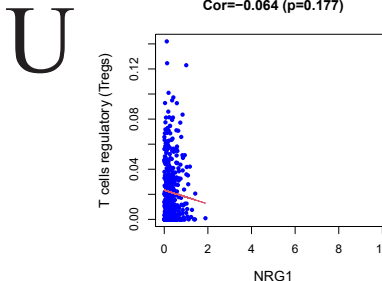

Supplement: f1 [file 2055676.f1.zip]

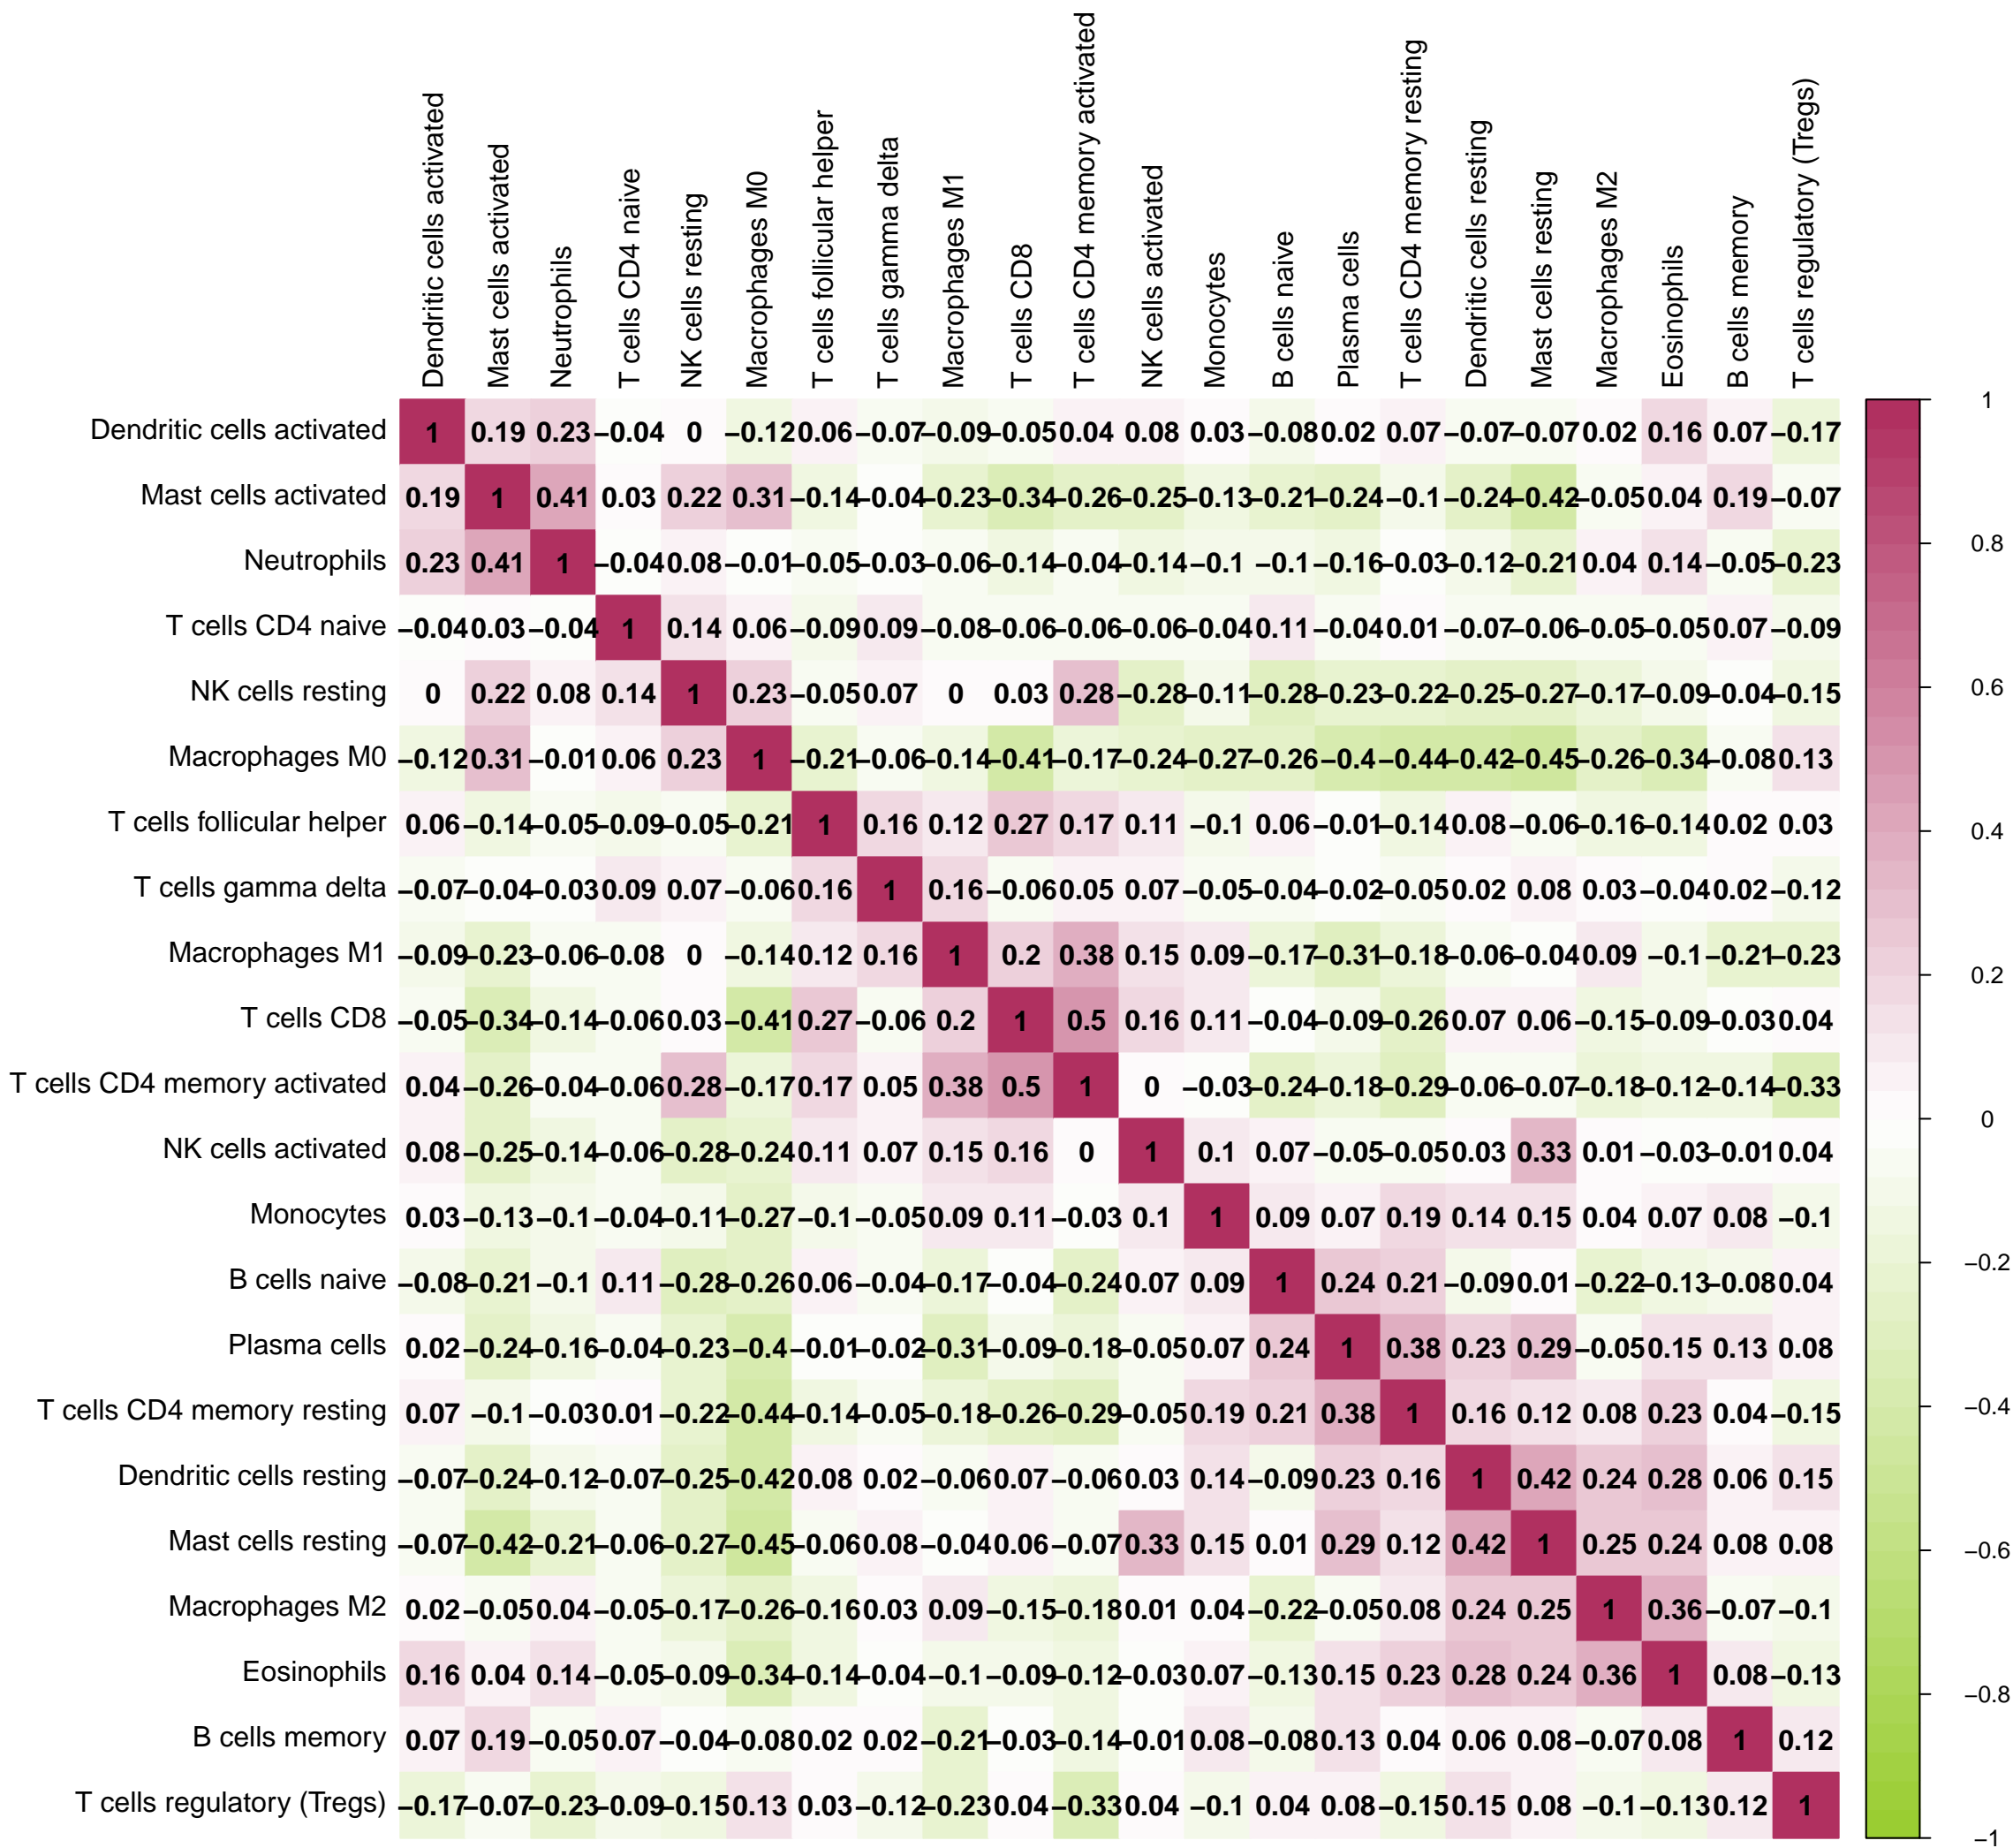

Supplement: f1 [file 2055676.f1.zip]

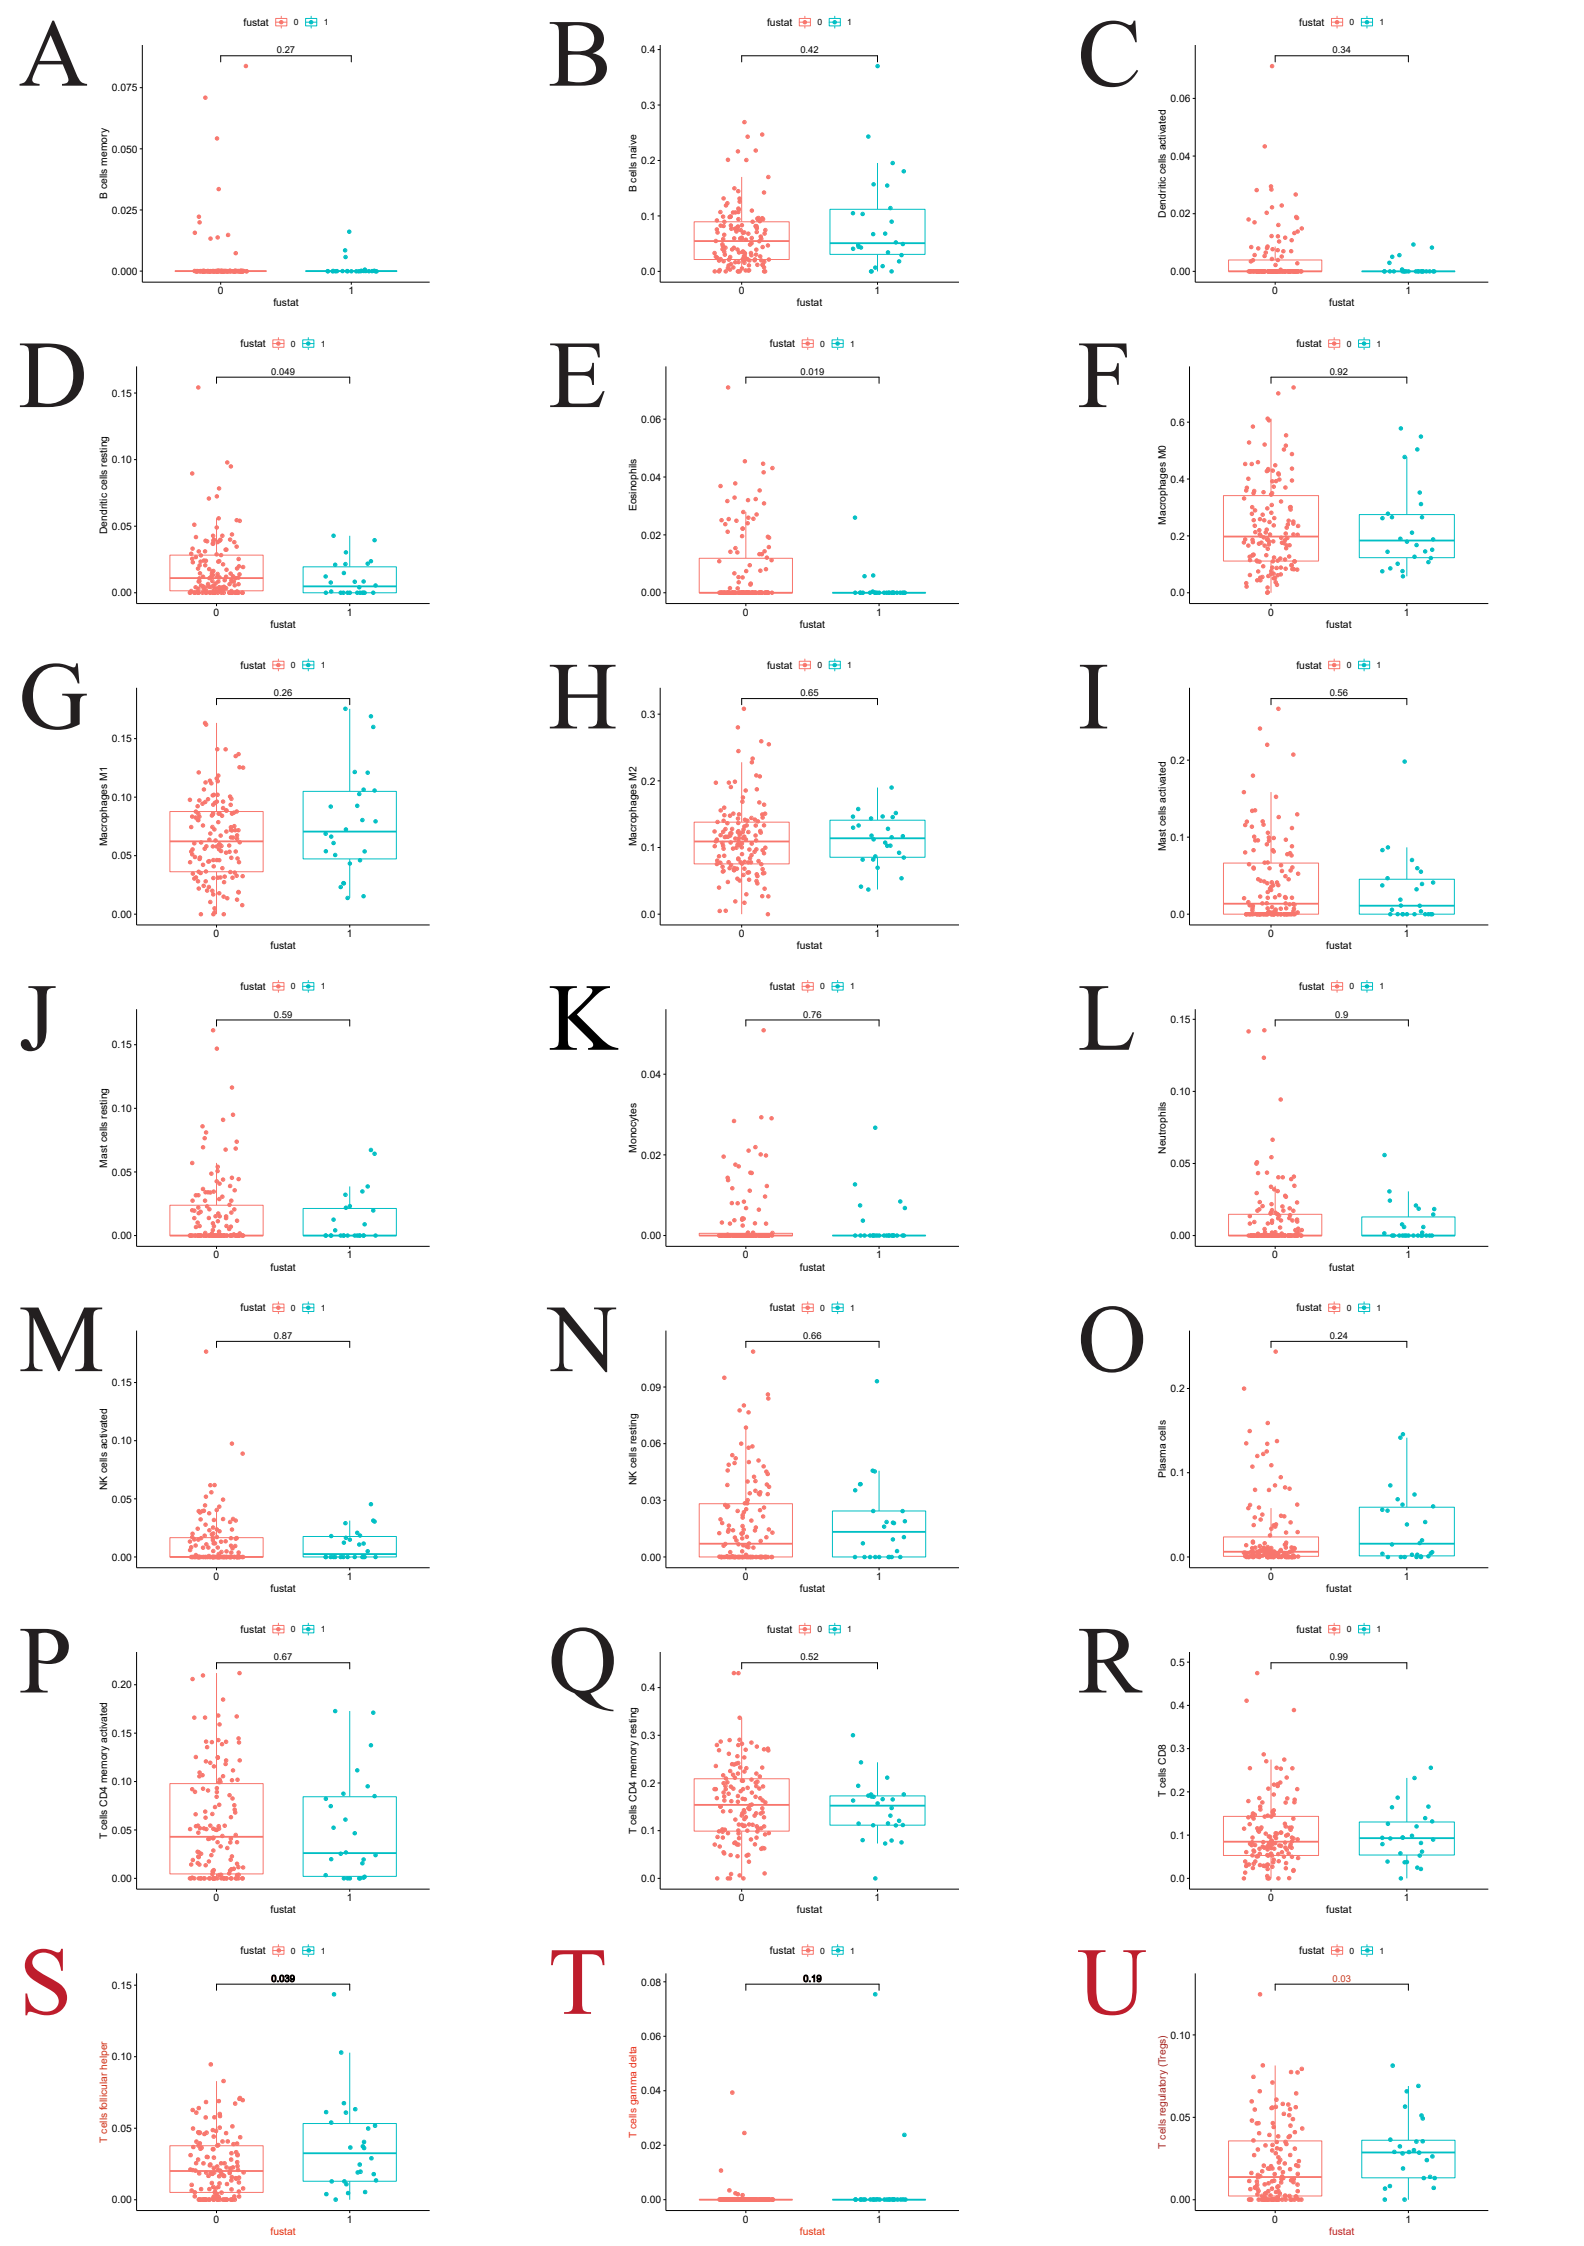

Supplement: f1 [file 2055676.f1.zip]
